# 1 The gene expression landscape of the human locus coeruleus 2 revealed by single-nucleus and spatially-resolved transcriptomics

3

## 4 **Authors**

5 Lukas M. Weber<sup>1,\*</sup>, Heena R. Divecha<sup>2,\*</sup>, Matthew N. Tran<sup>2</sup>, Sang Ho Kwon<sup>2,3</sup>, Abby Spangler<sup>2</sup>, Kelsey  
6 D. Montgomery<sup>2</sup>, Madhavi Tippani<sup>2</sup>, Rahul Bharadwaj<sup>2</sup>, Joel E. Kleinman<sup>2,4</sup>, Stephanie C. Page<sup>2</sup>,  
7 Thomas M. Hyde<sup>2,4,5</sup>, Leonardo Collado-Torres<sup>2</sup>, Kristen R. Maynard<sup>2,4</sup>, Keri Martinowich<sup>2,3,4,6,\*</sup>,  
8 Stephanie C. Hicks<sup>1,\*</sup>

9

## 10 **Affiliations**

- 11 1. Department of Biostatistics, Johns Hopkins Bloomberg School of Public Health, Baltimore, MD, 21205, USA
- 12 2. Lieber Institute for Brain Development, Johns Hopkins Medical Campus, Baltimore, MD, 21205, USA
- 13 3. Department of Neuroscience, Johns Hopkins School of Medicine, Baltimore, MD, 21205, USA
- 14 4. Department of Psychiatry and Behavioral Sciences, Johns Hopkins School of Medicine, Baltimore, MD,  
15 21205, USA
- 16 5. Department of Neurology, Johns Hopkins School of Medicine, Baltimore, MD, 21205, USA
- 17 6. The Kavli Neuroscience Discovery Institute, Johns Hopkins University, Baltimore, MD, 21205, USA

18

19 \* equal contribution

20

## 21 **Correspondence**

22 Stephanie C. Hicks  
23 shicks19@jhu.edu

24

25 Keri Martinowich  
26 keri.martinowich@libd.org

## 27 **Abstract**

28 Norepinephrine (NE) neurons in the locus coeruleus (LC) project widely throughout the central nervous  
29 system, playing critical roles in arousal and mood, as well as various components of cognition including  
30 attention, learning, and memory. The LC-NE system is also implicated in multiple neurological and  
31 neuropsychiatric disorders. Importantly, LC-NE neurons are highly sensitive to degeneration in both  
32 Alzheimer's and Parkinson's disease. Despite the clinical importance of the brain region and the  
33 prominent role of LC-NE neurons in a variety of brain and behavioral functions, a detailed molecular  
34 characterization of the LC is lacking. Here, we used a combination of spatially-resolved transcriptomics  
35 and single-nucleus RNA-sequencing to characterize the molecular landscape of the LC region and the  
36 transcriptomic profile of LC-NE neurons in the human brain. We provide a freely accessible resource of  
37 these data in web-accessible formats.

38

## 39 **Keywords**

40 Locus coeruleus, norepinephrine, spatially-resolved transcriptomics, single-nucleus RNA-sequencing,  
41 postmortem human tissue

## 42 Introduction

43 The locus coeruleus (LC) is a small bilateral nucleus located in the dorsal pons of the brainstem, which  
44 serves as the brain's primary site for production of the neuromodulator norepinephrine (NE). NE-  
45 producing neurons in the LC project widely to many regions of the central nervous system to modulate  
46 a variety of highly divergent functions including attention, arousal, and mood [1–4]. The LC, translated  
47 as “blue spot”, comprises merely 3,000 NE neurons in the rodent (~1500-1600 each side of the  
48 brainstem) [1], and estimates in the human LC range from 19,000-46,000 total NE neurons [5]. Despite  
49 its prominent involvement in a number of critical brain functions and its unique capacity to synthesize  
50 NE, the LC's small size and deep positioning within the brainstem has rendered it relatively intractable  
51 to a comprehensive cellular, molecular, and physiological characterization.

52  
53 The LC plays important roles in core behavioral and physiological brain function across the lifespan and  
54 in disease. For example, there is strong evidence for age-related cell loss in the LC [6,7], and the LC-  
55 NE system is implicated in multiple neuropsychiatric and neurological disorders [4,8]. The LC is one of  
56 the earliest sites of degeneration in Alzheimer's disease (AD) and Parkinson's disease (PD), and  
57 profound loss of LC-NE neurons is evident with disease progression [8–10]. Moreover, maintaining the  
58 neural density of LC-NE neurons prevents cognitive decline during aging [11]. In addition, primary  
59 neuropathologies for AD (hyperphosphorylated tau) and PD (alpha-synuclein) can be detected in the  
60 LC prior to other brain regions [12–15]. However, the molecular mechanisms rendering LC-NE neurons  
61 particularly vulnerable to age-related decline and neurodegeneration are not well-understood. In  
62 addition to its role in aging, the LC-NE system plays a critical role in mediating sustained attention, and  
63 its dysregulation is associated with attention-deficit hyperactivity disorder (ADHD) [16,17]. Of note, the  
64 NE reuptake inhibitor atomoxetine is the first non-stimulant medication that is FDA-approved for ADHD  
65 [18–20]. Better understanding the gene expression landscape of the LC and surrounding region and  
66 delineating the molecular profile of LC-NE neurons in the human brain could facilitate the ability to  
67 target these neurons for disease prevention or manipulate their function for treatment.

68  
69 The recent development of single-nucleus RNA-sequencing (snRNA-seq) and spatially-resolved  
70 transcriptomics (SRT) technological platforms provides an opportunity to investigate transcriptome-wide  
71 gene expression scale with cellular and spatial resolution [21,22]. SRT has recently been used to  
72 characterize transcriptome-wide gene expression within defined neuroanatomy of cortical regions in the  
73 postmortem human brain [22], while snRNA-seq has been used to investigate specialized cell types in  
74 a number of postmortem human brain regions including medium spiny neurons in the nucleus  
75 accumbens and dopaminergic neurons in the midbrain [21,23]. Importantly, snRNA-seq and SRT  
76 provide complementary views: snRNA-seq identifies transcriptome-wide gene expression within  
77 individual nuclei, while SRT captures transcriptome-wide gene expression in all cellular compartments  
78 (including the nucleus, cytoplasm, and cell processes) while retaining the spatial coordinates of these  
79 measurements. While not all SRT platforms achieve single-cell resolution, depending on the  
80 technological platform and tissue cell density, spatial gene expression has been resolved at, for  
81 example, ~1-10 cells per spatial measurement location with a diameter of 55  $\mu\text{m}$  in the human brain  
82 [22]. These platforms have been successfully used in tandem to spatially map single-nucleus gene  
83 expression in several regions of both neurotypical and pathological tissues in the human brain including  
84 the dorsolateral prefrontal cortex [22] and the dopaminergic substantia nigra [21].

85

86 In this report, we characterize the gene expression signature of the LC and surrounding region at  
87 spatial resolution, and identify and characterize a population of NE neurons at single-nucleus resolution  
88 in the neurotypical adult human brain. In addition to NE neurons, we identify a population of 5-  
89 hydroxytryptamine (5-HT, serotonin) neurons, which have not previously been characterized at the  
90 molecular level in human brain samples [24]. We observe expression of cholinergic marker genes  
91 within NE neurons, and confirm that this is due to co-expression within individual cells using fluorescent  
92 labeling with high-resolution imaging. We compare our findings from the human LC and adjacent region  
93 to molecular profiles of LC and peri-LC neurons that were previously characterized in rodents using  
94 alternative technological platforms [25–27], and observe partial conservation of LC-associated genes  
95 across these species.  
96

## 97 Results

### 98 Experimental design and study overview of postmortem human LC

99 We selected 5 neurotypical adult human brain donors to characterize transcriptome-wide gene  
100 expression within the LC at spatial and single-nucleus resolution using the 10x Genomics Visium SRT  
101 [28] and 10x Genomics Chromium snRNA-seq [29] platforms (see **Supplementary Table 1** for donor  
102 demographic details). In each tissue sample, the LC was first visually identified by neuroanatomical  
103 landmarks and presence of neurons containing the pigment neuromelanin on transverse slabs of the  
104 pons (**Figure 1A**). Prior to SRT and snRNA-seq assays, we ensured that the tissue blocks  
105 encompassed the LC by probing for known LC marker genes [30]. Specifically, we cut 10  $\mu\text{m}$   
106 cryosections from tissue blocks from each donor and probed for the presence of a pan-neuronal marker  
107 gene (*SNAP25*) and two NE neuron-specific marker genes (*TH* and *SLC6A2*) by multiplexed single-  
108 molecule fluorescence *in situ* hybridization (smFISH) using RNAscope [31,32] (**Figure 1B**). Robust  
109 mRNA signal from these markers, visualized as puncta on imaged tissue sections, was used as a  
110 quality control measure in all tissue blocks prior to proceeding with inclusion in the study and  
111 performing SRT and snRNA-seq assays.  
112

113 For tissue blocks included in the study, we cut additional 10  $\mu\text{m}$  tissue sections, which were used for  
114 gene expression profiling at spatial resolution using the 10x Genomics Visium SRT platform [28]  
115 (**Figure 1C**). Fresh-frozen tissue sections were placed onto each of four capture areas per Visium slide,  
116 where each capture area contains approximately 5,000 expression spots (spatial measurement  
117 locations with diameter 55  $\mu\text{m}$  and 100  $\mu\text{m}$  center-to-center, where transcripts are captured) laid out in  
118 a honeycomb pattern. Spatial barcodes unique to each spot are incorporated during reverse  
119 transcription, thus allowing the spatial coordinates of the gene expression measurements to be  
120 identified [28]. Visium slides were stained with hematoxylin and eosin (H&E), followed by high-  
121 resolution acquisition of histology images prior to on-slide cDNA synthesis, completion of the Visium  
122 assay, and sequencing. For our study, 10  $\mu\text{m}$  tissue sections from the LC-containing tissue blocks were  
123 collected from the 5 brain donors, with assays completed on 2-4 tissue sections per donor. Given the  
124 small size of the LC compared to the area of the array, tissue blocks were scored to fit 2-3 tissue  
125 sections from the same donor onto a single capture area to maximize the use of the Visium slides,  
126 resulting in a total of  $N=9$  Visium capture areas (hereafter referred to as samples).  
127

128 For 3 of the 5 donors, we cut additional 100  $\mu\text{m}$  sections from the same tissue blocks to profile  
129 transcriptome-wide gene expression at single-nucleus resolution with the 10x Genomics Chromium  
130 single cell 3' gene expression platform [29] (**Figure 1C**). Prior to collecting tissue sections, the tissue  
131 blocks were scored to enrich for NE neuron-containing regions. Neuronal enrichment was employed  
132 with fluorescence-activated nuclear sorting (FANS) prior to library preparation to enhance capture of  
133 neuronal population diversity, and snRNA-seq assays were subsequently completed. **Supplementary**  
134 **Table 1** provides a summary of SRT and snRNA-seq sample information and demographic  
135 characteristics of the donors.  
136  
137



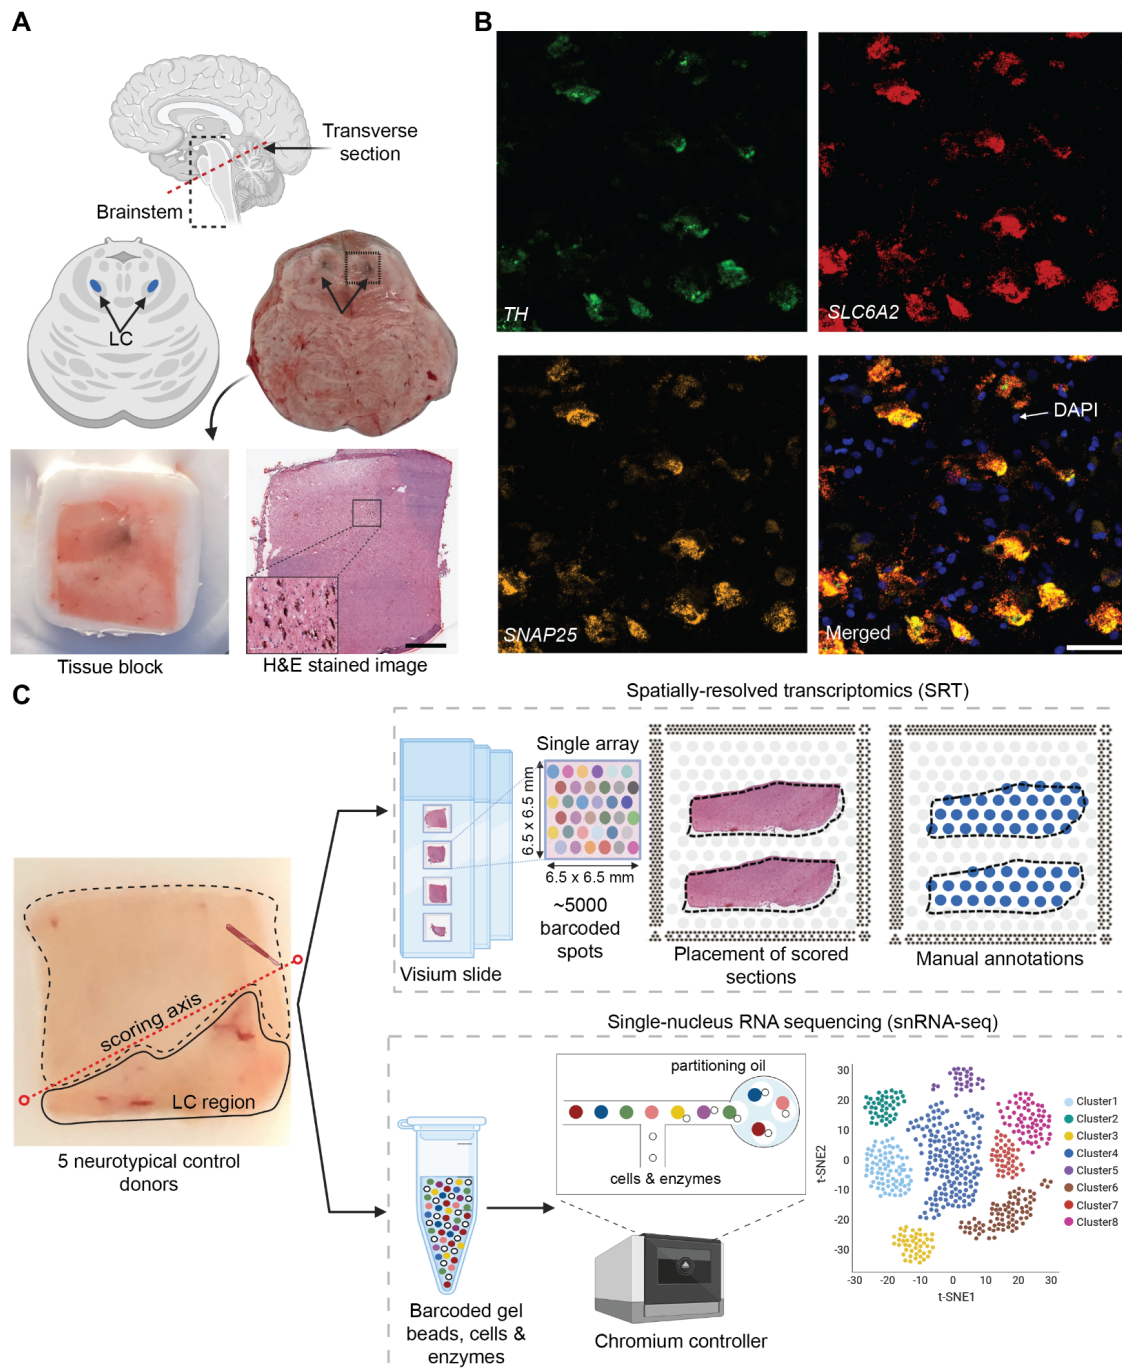

138  
 139 **Figure 1: Experimental design to measure the landscape of gene expression in the postmortem human**  
 140 **locus coeruleus (LC) using spatially-resolved transcriptomics (SRT) and single-nucleus RNA-seq**  
 141 **(snRNA-seq). (A)** Brainstem dissections at the level of the LC were conducted to collect tissue blocks from 5  
 142 neurotypical adult human brain donors. **(B)** Inclusion of the LC within the tissue sample block was validated using  
 143 RNAscope [31,32] for a pan-neuronal marker gene (*SNAP25*) and two NE neuron-specific marker genes (*TH* and  
 144 *SLC6A2*). High-resolution H&E stained histology images were acquired prior to SRT and snRNA-seq assays  
 145 (scale bars: 2 mm in H&E stained image; 20  $\mu$ m in RNAscope images). **(C)** Prior to collecting tissue sections for  
 146 SRT and snRNA-seq assays, tissue blocks were scored to enrich for the NE neuron-containing regions. For each  
 147 sample, the LC region was manually annotated by visually identifying NE neurons in the H&E stained tissue  
 148 sections. 100  $\mu$ m tissue sections from 3 of the same donors were used for snRNA-seq assays, which included  
 149 FANS-based neuronal enrichment prior to library preparation to enrich for neuronal populations.

## 150 **Spatial gene expression in the human LC**

151 After applying the 10x Genomics Visium SRT platform [28], we executed several analyses to  
152 characterize transcriptome-wide gene expression at spatial resolution within the human LC. First, we  
153 manually annotated spots within regions identified as containing LC-NE neurons, based on  
154 pigmentation, cell size, and morphology from the H&E stained histology images (**Figure 2A** and  
155 **Supplementary Figure 1**). Next, we performed additional sample-level quality control (QC) on the  
156 initial  $N=9$  Visium capture areas (hereafter referred to as samples) by visualizing expression of two NE  
157 neuron-specific marker genes (*TH* and *SLC6A2*) (**Figure 2B**), which identified one sample  
158 (Br5459\_LC\_round2) without clear expression of these markers (**Supplementary Figure 2A-B**). This  
159 sample was excluded from subsequent analyses, leaving  $N=8$  samples from 4 out of the 5 donors. For  
160 the  $N=8$  Visium samples, the annotated regions were highly enriched in the expression of the NE  
161 neuron marker genes (*TH* and *SLC6A2*) (**Figure 2C** and **Supplementary Figure 2C**), confirming that  
162 these samples captured dense regions of LC-NE neurons within the annotated regions. We performed  
163 spot-level QC to remove low-quality spots based on QC metrics previously applied to SRT data  
164 [22,33,34] (**Methods**). Due to the large differences in read depth between samples (**Supplementary**  
165 **Figure 3A, Supplementary Table 1, Methods**), we performed spot-level QC independently within  
166 each sample. After filtering low-expressed genes (**Methods**), this resulted in a total of 12,827 genes  
167 and 20,380 spots across the  $N=8$  samples used for downstream analyses (**Supplementary Figure**  
168 **3B**).

169  
170 To investigate whether the LC regions could be annotated in a data-driven manner, we applied a  
171 spatially-aware unsupervised clustering algorithm (BayesSpace [35]) after applying a batch integration  
172 tool (Harmony [36]) to remove sample-specific technical variation in the molecular measurements  
173 (**Supplementary Figure 4**). The spatially-aware clustering using  $k=5$  clusters identified one cluster that  
174 overlapped with the manually annotated LC regions in several samples. However, the proportion of  
175 overlapping spots between the manually annotated LC region and this data-driven cluster (cluster 4,  
176 colored red in **Supplementary Figure 5A**) was relatively low and varied across samples. We  
177 quantitatively evaluated the clustering performance by calculating the precision, recall, F1 score, and  
178 adjusted Rand index (ARI) for this cluster in each sample (see **Methods** for definitions). We found that  
179 while precision was  $>0.8$  in 3 out of 8 samples, recall was  $<0.4$  in all samples, the F1 score was  $<0.6$  in  
180 all samples, and the ARI was  $<0.5$  in all samples (**Supplementary Figure 5B**). Therefore, we judged  
181 that the data-driven spatial domains identified from BayesSpace were not sufficiently reliable to use for  
182 the downstream analyses, and instead proceeded with the histology-driven manual annotations for all  
183 further analyses. In addition, we note that using the manual annotations avoids potential issues due to  
184 inflated false discoveries resulting from circularity when performing differential gene expression testing  
185 between sets of cells or spots defined by unsupervised clustering, when the same genes are used for  
186 both clustering and differential testing [37]. Next, in addition to the manually annotated LC regions, we  
187 also manually annotated a set of individual spots that overlapped with NE neuron cell bodies identified  
188 within the LC regions, based on pigmentation, cell size, and morphology from the H&E histology  
189 images (**Supplementary Figure 6A**). However, we observed relatively low overlap between spots with  
190 expression of NE neuron marker genes and this second set of annotated individual spots. For example,  
191 out of 706 annotated spots, only 331 spots had  $\geq 2$  observed UMI counts of *TH* (**Supplementary**  
192 **Figure 6B**). We hypothesize that this may be due to technical factors including sampling variability in  
193 the gene expression measurements, partial overlap between spots and cell bodies, potential diffusion  
194 of mRNA molecules between spots, as well as biological variability in the expression of these marker  
195 genes. Therefore, we instead used the LC region-level manual annotations for all further analyses.

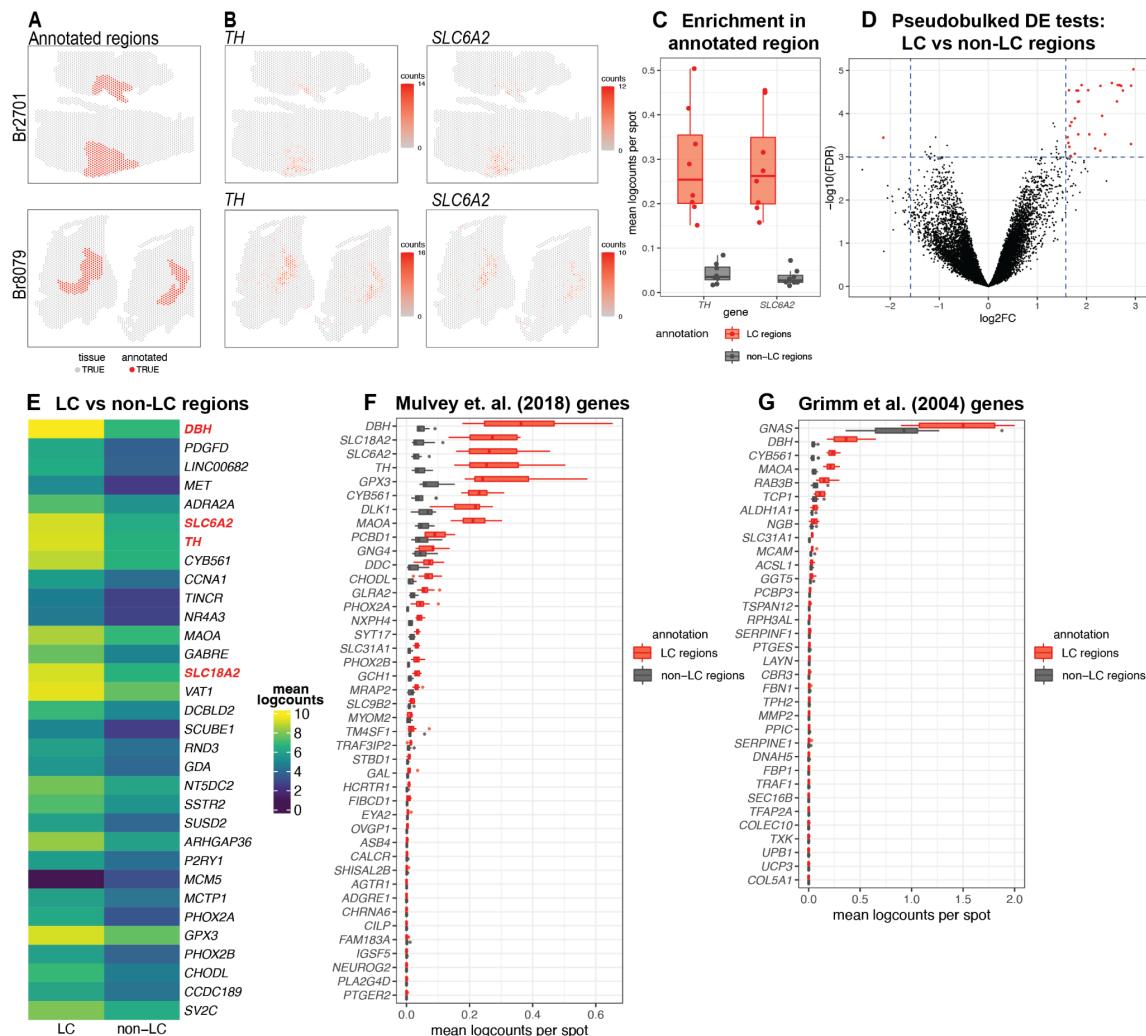

196  
197 **Figure 2: Spatial gene expression in the human LC using SRT.** (A) Spots within manually annotated LC  
198 regions containing NE neurons (red) and non-LC regions (gray), which were identified based on pigmentation, cell  
199 size, and morphology from the H&E stained histology images, from donors Br2701 (top row) and Br8079 (bottom  
200 row). (B) Expression of two NE neuron-specific marker genes (*TH* and *SLC6A2*). Color scale indicates unique  
201 molecular identifier (UMI) counts per spot. Additional samples corresponding to A and B are shown in  
202 **Supplementary Figures 1, 2A-B.** (C) Boxplots illustrating the enrichment in expression of two NE neuron-  
203 specific marker genes (*TH* and *SLC6A2*) in manually annotated LC regions compared to non-LC regions in the  
204 *N*=8 Visium samples. Values show mean log-transformed normalized counts (logcounts) per spot within the  
205 regions per sample. Additional details are shown in **Supplementary Figure 2C.** (D) Volcano plot resulting from  
206 differential expression (DE) testing between the pseudobulked manually annotated LC and non-LC regions, which  
207 identified 32 highly significant genes (red) at a false discovery rate (FDR) significance threshold of 10<sup>-3</sup> and  
208 expression fold-change (FC) threshold of 3 (dashed blue lines). Horizontal axis is shown on log<sub>2</sub> scale and vertical  
209 axis on log<sub>10</sub> scale. Additional details and results for 437 statistically significant genes identified at an FDR  
210 threshold of 0.05 and an FC threshold of 2 are shown in **Supplementary Figure 7** and **Supplementary Table 2.**  
211 (E) Average expression in manually annotated LC and non-LC regions for the 32 genes from D. Color scale  
212 shows logcounts in the pseudobulked LC and non-LC regions averaged across *N*=8 Visium samples. Genes are  
213 ordered in descending order by FDR (**Supplementary Table 2**). (F-G) Cross-species comparison showing  
214 expression of human ortholog genes for LC-associated genes identified in the rodent LC [25,26] using alternative  
215 experimental technologies. Boxplots show mean logcounts per spot in the manually annotated LC and non-LC  
216 regions per sample in the human data.



217 Next, to identify expressed genes associated with the LC regions, we performed differential expression  
218 (DE) testing between the manually annotated LC and non-LC regions by pseudobulking spots, defined  
219 as aggregating UMI counts from the combined spots within the annotated LC and non-LC regions in  
220 each sample [22]. This analysis identified 32 highly significant genes at a false discovery rate (FDR)  
221 threshold of  $10^{-3}$  and expression fold-change (FC) threshold of 3 (**Figure 2D** and **Supplementary**  
222 **Figure 7A**). This includes known NE neuron marker genes including *DBH* (the top-ranked gene by FDR  
223 within this set), *SLC6A2* (ranked 6th), *TH* (ranked 7th), and *SLC18A2* (ranked 14th). Out of the 32  
224 genes, 31 were elevated in expression within the LC regions, while one (*MCM5*) was depleted. The set  
225 includes one long noncoding RNA (*LINC00682*), while the remaining 31 genes are protein-coding  
226 genes (**Figure 2E** and **Supplementary Table 2**). Alternatively, using standard significance thresholds  
227 of FDR < 0.05 and expression FC > 2, we identified a total of 437 statistically significant genes  
228 (**Supplementary Figure 7B** and **Supplementary Table 2**).

229  
230 As a second approach to identify genes associated with LC-NE neurons in an unsupervised manner,  
231 we applied a method to identify spatially variable genes (SVGs), nnSVG [38]. This method ranks genes  
232 in terms of the strength in the spatial correlation in their expression patterns across the tissue areas.  
233 We ran nnSVG within each contiguous tissue area containing an annotated LC region for the  $N=8$   
234 Visium samples (total 13 tissue areas, where each Visium sample contains 1-3 tissue areas) and  
235 combined the lists of top-ranked SVGs for the multiple tissue areas by averaging the ranks per gene. In  
236 this analysis, we found that a subset of the top-ranked SVGs (11 out of the top 50) were highly-ranked  
237 in samples from only one donor (Br8079), which we determined was due to the inclusion of a section of  
238 the choroid plexus adjacent to the LC in these samples (based on expression of choroid plexus marker  
239 genes including *CAPS* and *CRLF1*) (**Supplementary Figure 8A-C**). In order to focus on LC-associated  
240 SVGs that were replicated across samples, we excluded the choroid plexus-associated genes by  
241 calculating an overall average ranking of SVGs that were each included within the top 100 SVGs in at  
242 least 10 out of the 13 tissue areas, which identified a list of 32 highly-ranked, replicated LC-associated  
243 SVGs. These genes included known NE neuron marker genes (*DBH*, *TH*, *SLC6A2*, and *SLC18A2*) as  
244 well as mitochondrial genes (**Supplementary Figure 8D**).

245  
246 We also compared the expression of LC-associated genes previously identified in the rodent LC from  
247 two separate studies. The first study used translating ribosomal affinity purification sequencing (TRAP-  
248 seq) using an *SLC6A2* bacTRAP mouse line to identify gene expression profiles of the transcriptome of  
249 LC neurons [25]. The second study used microarrays to assess gene expression patterns from laser-  
250 capture microdissection of individual cells in tissue sections of the rat LC [26]. We converted the lists of  
251 rodent LC-associated genes from these studies to human orthologs and calculated average expression  
252 for each gene within the manually annotated LC and non-LC regions. A small number of genes from  
253 both studies were highly associated with the manually annotated LC regions in the human data,  
254 including *DBH*, *TH*, and *SLC6A2* from [25], and *DBH* and *GNAS* from [26]. However, the majority of the  
255 genes from both studies were expressed at low levels in the human data, which may reflect species-  
256 specific differences in biological function of these genes as well as differences due to the experimental  
257 technologies employed (**Figure 2F-G**).

258  
259

## 260 **Single-nucleus gene expression of NE neurons in the human LC**

261 To add cellular resolution to our spatial analyses, we characterized gene expression in the human LC  
262 and surrounding region at single-nucleus resolution using the 10x Genomics Chromium single cell 3'  
263 gene expression platform [29] in 3 of the same neurotypical adult donors from the SRT analyses.  
264 Samples were enriched for NE neurons by scoring tissue blocks for the LC region and performing  
265 FANS to enhance capture of neurons. After raw data processing, doublet removal using scDblFinder  
266 [39], and standard QC and filtering, we obtained a total of 20,191 nuclei across the 3 samples (7,957,  
267 3,015, and 9,219 nuclei respectively from donors Br2701, Br6522, and Br8079) (see **Supplementary**  
268 **Table 1** for additional details). For nucleus-level QC processing, we used standard QC metrics  
269 including the sum of UMI counts and detected genes [33] (see **Methods** for additional details). We  
270 observed an unexpectedly high proportion of mitochondrial reads in nuclei with expression of NE  
271 neuron marker genes (*DBH*, *TH*, and *SLC6A2*), which represented our rare population of interest, and  
272 hence we did not remove nuclei based on proportion of mitochondrial reads (**Supplementary Figures**  
273 **9-10**).

274  
275 We identified NE neuron nuclei in the snRNA-seq data by applying an unsupervised clustering workflow  
276 adapted from workflows used for snRNA-seq data in the human brain [23], using a two-stage clustering  
277 algorithm consisting of high-resolution *k*-means and graph-based clustering that provides sensitivity to  
278 identify rare cell populations [33]. The unsupervised clustering workflow identified 30 clusters, including  
279 clusters representing major neuronal and non-neuronal cell populations, which we labeled based on  
280 expression of known marker genes (**Figure 3A-B**). This included a cluster of NE neurons consisting of  
281 295 nuclei (168, 4, and 123 nuclei from donors Br2701, Br6522, and Br8079, respectively), which we  
282 identified based on expression of NE neuron marker genes (*DBH*, *TH*, and *SLC6A2*). In addition to the  
283 NE neuron cluster, we identified clusters representing excitatory neurons, inhibitory neurons,  
284 astrocytes, endothelial and mural cells, macrophages and microglia, oligodendrocytes, and  
285 oligodendrocyte precursor cells (OPCs), as well as several clusters with ambiguous expression profiles  
286 including pan-neuronal marker genes (*SNAP25* and *SYT1*), which may represent damaged neuronal  
287 nuclei (**Figure 3A-B** and **Supplementary Figure 9**).

288  
289 To validate the unsupervised clustering, we also applied a supervised strategy to identify NE neuron  
290 nuclei by simply thresholding on expression of NE neuron marker genes (selecting nuclei with  $\geq 1$  UMI  
291 counts of both *DBH* and *TH*). As described above, we noted a higher than expected proportion of  
292 mitochondrial reads in nuclei with expression of *DBH* and *TH*, and did not filter on this parameter during  
293 QC processing, in order to retain these nuclei (**Supplementary Figure 10A-B**). This supervised  
294 approach identified 332 NE neuron nuclei (173, 4, and 155 nuclei from donors Br2701, Br6522, and  
295 Br8079, respectively), including 188 out of the 295 NE neuron nuclei identified by unsupervised  
296 clustering (**Supplementary Figure 10C**). We hypothesized that the differences for nuclei that did not  
297 agree between the two approaches were due to sampling variability in the snRNA-seq measurements  
298 for these two marker genes. To confirm this, we used an alternative method (smFISH RNAscope [32])  
299 to assess co-localization of three NE neuron marker genes (*DBH*, *TH*, and *SLC6A2*) within individual  
300 cells on additional tissue sections from one additional independent donor (Br8689). Visualization of  
301 high-magnification confocal images demonstrated clear co-localization of these three marker genes  
302 within individual cells (**Supplementary Figure 11**). Since the unsupervised clustering is based on  
303 expression of a large number of genes and is therefore less sensitive to sampling variability for  
304 individual genes, we used the unsupervised clustering results for all further downstream analyses.

305

306 We performed DE testing between the neuronal clusters and identified 327 statistically significant  
307 genes with elevated expression in the NE neuron cluster, compared to all other neuronal clusters  
308 captured in this region, at an FDR threshold of 0.05 and FC threshold of 2. These genes include known  
309 NE neuron marker genes (*DBH*, *TH*, *SLC6A2*, and *SLC18A2*) as well as the 13 protein-coding  
310 mitochondrial genes, which are highly expressed in large, metabolically active NE neurons (**Figure 3C**,  
311 **Supplementary Figure 12A**, and **Supplementary Table 4**). Compared to the LC-associated genes  
312 identified in the SRT samples, differences are expected since the snRNA-seq data contains  
313 measurements from nuclei at single-nucleus resolution, while the SRT samples contain reads from  
314 nuclei, cytoplasm, and cell processes from multiple cell populations within the annotated LC regions.

315  
316 To compare with previous results in rodents, we evaluated the expression of the rodent LC marker  
317 genes from [25,26] in the NE neuron cluster compared to all other neuronal clusters in the human  
318 snRNA-seq data (**Figure 3D-E**). Consistent with the SRT samples, we observed that several genes  
319 were conserved across species. However, compared to the SRT samples, we observed relatively  
320 higher expression of the conserved genes within the NE neuron cluster, which is expected since the NE  
321 neuron cluster contains reads from individual nuclei from this population only.

322  
323 We note that a recent publication using snRNA-seq in mice found that LC-NE neurons were highly  
324 enriched for *Calca*, *Cartpt*, *Gal*, and *Calcr* in addition to canonical NE neuron marker genes [27]. In the  
325 human data, we noted significant enrichment of *GAL* and *CARTPT* in DE testing between the manually  
326 annotated LC and non-LC regions in the SRT samples (**Supplementary Table 2**). While visualization  
327 of the snRNA-seq clustering suggests that *CARTPT* is expressed in the NE neuron cluster in the  
328 snRNA-seq data (**Supplementary Figure 13**), it was not identified as statistically significant in the DE  
329 testing between the NE cluster compared to all other neuronal clusters (**Supplementary Table 4**). For  
330 *CALCA* and *CALCR*, we observed no enrichment in the annotated LC regions in the SRT samples, nor  
331 in the NE neuron cluster in the snRNA-seq data (**Supplementary Tables 2, 4** and **Supplementary**  
332 **Figure 13**).

333

### 334 **Identification of 5-HT neurons and diversity of inhibitory neuron subpopulations in single-** 335 **nucleus data**

336 In addition to NE neurons, we identified a cluster of likely 5-hydroxytryptamine (5-HT, serotonin)  
337 neurons in the unsupervised clustering analyses of the snRNA-seq data (**Figure 3A-B**) based on  
338 expression of 5-HT neuron marker genes (*TPH2* and *SLC6A4*) [40]. This cluster consisted of 186 nuclei  
339 (145, 28, and 13 nuclei from donors Br2701, Br6522, and Br8079, respectively). DE testing between  
340 the neuronal clusters identified 361 statistically significant genes with elevated expression in the 5-HT  
341 neuron cluster, compared to all other neuronal clusters captured in this region, at an FDR threshold of  
342 0.05 and FC threshold of 2. These genes included the 5-HT neuron marker genes *TPH2* and *SLC6A4*  
343 (**Figure 3F**, **Supplementary Figure 12B**, and **Supplementary Table 5**). To investigate the spatial  
344 distribution of this population, we visualized the spatial expression of the 5-HT neuron marker genes  
345 *TPH2* and *SLC6A4* in the *N*=9 initial Visium samples, which showed that this population was distributed  
346 across both the LC and non-LC regions (**Supplementary Figure 14A-B**). Similarly, we did not observe  
347 significant spatial enrichment of *TPH2* and *SLC6A4* expression within the manually annotated LC  
348 regions (**Supplementary Figure 14C**). To further confirm this finding, we applied RNAscope [32] to  
349 visualize expression of an NE neuron marker gene (*TH*) and 5-HT neuron marker genes (*TPH2* and  
350 *SLC6A4*) within additional tissue sections from donor Br6522, which demonstrated that the NE and 5-



351 HT marker genes were expressed within distinct cells and these neuronal populations were not  
352 localized within the same regions (**Supplementary Figure 15**).

353

354 We also investigated the diversity of inhibitory neuronal subpopulations within the snRNA-seq data from  
355 the human LC and surrounding region by applying a secondary round of unsupervised clustering to the  
356 inhibitory neuron nuclei identified in the first round of clustering. This identified 14 clusters representing  
357 inhibitory neuronal subpopulations, which varied in their expression of several inhibitory neuronal  
358 marker genes including *CALB1*, *CALB2*, *TAC1*, *CNR1*, and *VIP* (additional marker genes shown in  
359 **Supplementary Figures 13, 16**). In addition, similar to recently published results from mice [27], we  
360 found that expression of neuropeptides *PNOG*, *TAC1*, and *PENK* varied across the individual inhibitory  
361 neuronal populations (**Supplementary Figure 13**).

362

363 In order to integrate the single-nucleus and spatial data, we also applied a spot-level deconvolution  
364 algorithm, cell2location [41], to map the spatial coordinates of NE and 5-HT neurons within the Visium  
365 samples. This algorithm integrates the snRNA-seq and SRT data by estimating the cell abundance of  
366 the snRNA-seq populations, which are used as reference populations at cellular resolution, at each  
367 spatial location (spot) in the Visium samples. This successfully mapped the NE neuron population from  
368 the snRNA-seq data to the manually annotated LC regions in the Visium samples (**Supplementary**  
369 **Figure 17A**). Similarly, for the 5-HT neurons, this population was mapped to the regions where this  
370 population was previously identified based on expression of marker genes (**Supplementary Figure**  
371 **17B**). However, the estimated absolute cell abundance of these neuronal populations per spot was  
372 higher than expected, which may be due to their relatively large size and high transcriptional activity,  
373 especially for NE neurons, compared to other neuronal and non-neuronal cell populations.

374

### 375 **Co-expression of cholinergic marker genes within NE neurons**

376 We observed expression of cholinergic marker genes, including *SLC5A7*, which encodes the high-  
377 affinity choline transporter, and *ACHE*, within the NE neuron cluster in the snRNA-seq data  
378 (**Supplementary Figure 13**). Because this result was unexpected, we experimentally confirmed co-  
379 expression of *SLC5A7* transcripts with transcripts for NE neuron marker genes in individual cells using  
380 RNAscope [32] on independent tissue sections from donors Br6522 and Br8079. We used RNAscope  
381 probes for *SLC5A7* and *TH* (NE neuron marker), and imaged stained sections at 63x magnification to  
382 generate high-resolution images, which allowed us to definitively localize expression of individual  
383 transcripts within cell bodies. This confirmed co-expression of *SLC5A7* and *TH* in individual cells in a  
384 tissue section from donor Br8079 (**Supplementary Figure 18**), validating that these transcripts are  
385 expressed within the same cells. To further investigate the spatial distribution of the cholinergic marker  
386 genes, we visualized expression of *SLC5A7* and *ACHE* in the Visium samples, which showed that  
387 these genes were expressed both within and outside the annotated LC regions (**Supplementary**  
388 **Figure 19**).

389

390

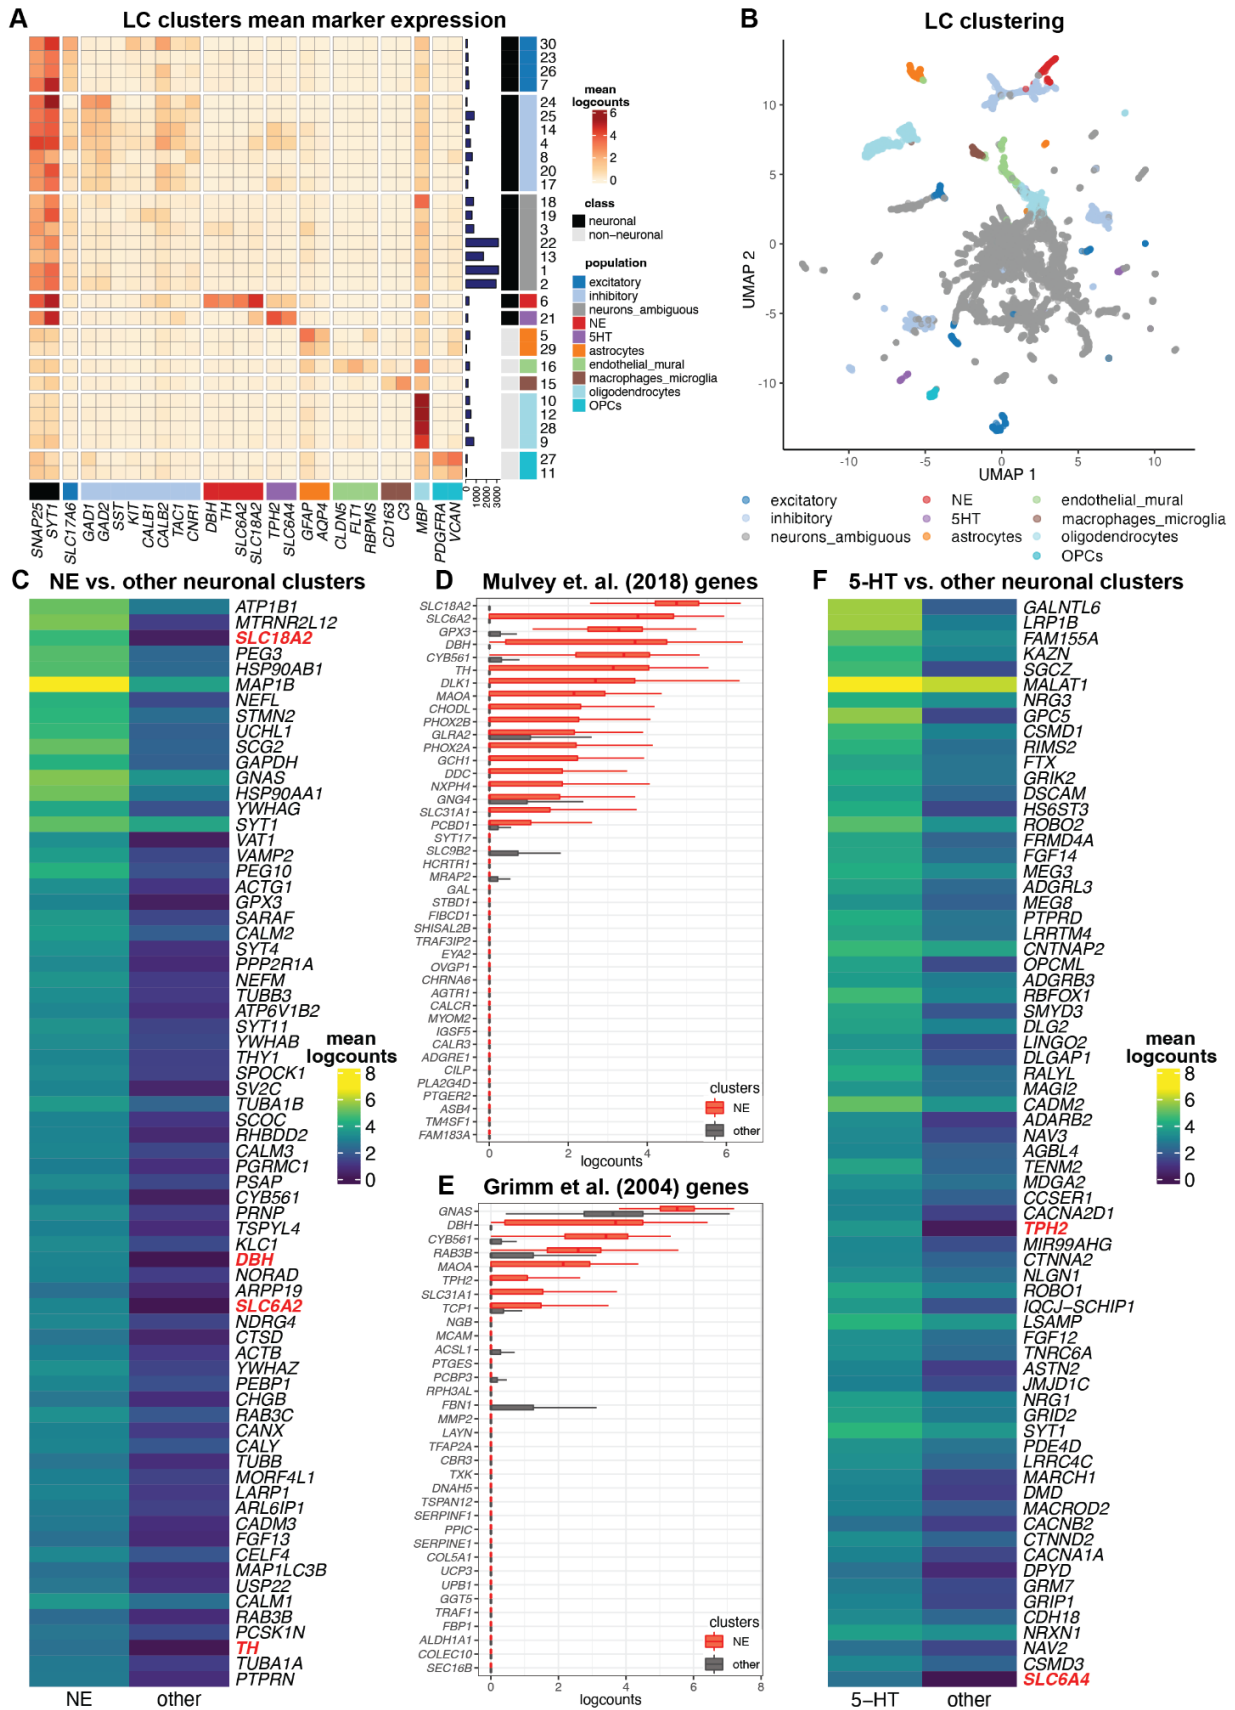

393 **Figure 3: Single-nucleus gene expression in the human LC using snRNA-seq.** We applied an unsupervised  
 394 clustering workflow to identify cell populations in the snRNA-seq data. **(A)** Unsupervised clustering identified 30  
 395 clusters representing populations including NE neurons (red), 5-HT neurons (purple), and other major neuronal  
 396 and non-neuronal cell populations (additional colors). Marker genes (columns) were used to identify clusters  
 397 (rows). Cluster IDs are shown in labels on the right, and numbers of nuclei per cluster are shown in horizontal  
 398 bars on the right. Heatmap values represent mean logcounts per cluster. **(B)** UMAP representation of nuclei, with  
 399 colors matching cell populations from heatmap. **(C)** DE testing between neuronal clusters identified a total of 327  
 400 statistically significant genes with elevated expression in the NE neuron cluster, at an FDR threshold of 0.05 and  
 401 FC threshold of 2. Heatmap displays the top 70 genes, ranked in descending order by FDR, excluding  
 402 mitochondrial genes, with NE neuron marker genes described in text highlighted in red. The full list of 327 genes  
 403 including mitochondrial genes is provided in **Supplementary Table 4**. Heatmap values represent mean logcounts  
 404 in the NE neuron cluster and mean logcounts per cluster averaged across all other neuronal clusters. **(D-E)**  
 405 Cross-species comparison showing expression of human ortholog genes for LC-associated genes identified in the  
 406 rodent LC [25,26] using alternative experimental technologies. Boxplots show logcounts per nucleus in the NE  
 407 neuron cluster and all other neuronal clusters. Boxplot whiskers extend to 1.5 times interquartile range, and  
 408 outliers are not shown. **(F)** DE testing between neuronal clusters identified a total of 361 statistically significant  
 409 genes with elevated expression in the 5-HT neuron cluster, at an FDR threshold of 0.05 and FC threshold of 2.  
 410 Heatmap displays the top 70 genes, ranked in descending order by FDR, with 5-HT neuron marker genes  
 411 described in text highlighted in red. The full list of 361 genes is provided in **Supplementary Table 5**.  
 412  
 413

#### 414 **Interactive and accessible data resources**

415 We provide freely accessible data resources containing all datasets described in this manuscript, in the  
 416 form of both interactive web-accessible and downloadable resources (**Table 1**). The interactive  
 417 resources can be explored in a web browser via a Shiny [42] app for the Visium SRT data and an iSEE  
 418 [43] app for the snRNA-seq data (**Supplementary Figure 20**). The data resources are also available  
 419 from an R/Bioconductor ExperimentHub data package as downloadable objects in the  
 420 SpatialExperiment [44] and SingleCellExperiment [33] formats, which can be loaded in an R session  
 421 and contain meta-data including manual annotation labels and cluster labels.  
 422

| Resource                                  | Data                     | Format                                                                                              | Link                                                                                                                                                                                              |
|-------------------------------------------|--------------------------|-----------------------------------------------------------------------------------------------------|---------------------------------------------------------------------------------------------------------------------------------------------------------------------------------------------------|
| Shiny [42] web app                        | Visium SRT               | Interactive web app                                                                                 | <a href="https://libd.shinyapps.io/locus-c_Visium/">https://libd.shinyapps.io/locus-c_Visium/</a>                                                                                                 |
| iSEE [43] web app                         | snRNA-seq                | Interactive web app                                                                                 | <a href="https://libd.shinyapps.io/locus-c_snRNA-seq/">https://libd.shinyapps.io/locus-c_snRNA-seq/</a>                                                                                           |
| R/Bioconductor ExperimentHub data package | Visium SRT and snRNA-seq | Downloadable R/Bioconductor objects in SpatialExperiment [44] and SingleCellExperiment [33] formats | <a href="https://bioconductor.org/packages/WeberDivechaLCdata">https://bioconductor.org/packages/WeberDivechaLCdata</a> (available in Bioconductor release version 3.16 from Nov 2, 2022 onwards) |

423  
 424 **Table 1: Summary of data resources providing access to datasets described in this manuscript.** All  
 425 datasets described in this manuscript are freely accessible in the form of interactive web apps and downloadable  
 426 R/Bioconductor objects.  
 427  
 428

429

## Discussion

430 Due to the small size and inaccessibility of the LC within the brainstem, this region has been relatively  
431 understudied in the human brain, despite its involvement in numerous functions and disease  
432 mechanisms. Our dataset provides the first transcriptome-wide characterization of the gene expression  
433 landscape of the human locus coeruleus (LC) using spatially-resolved transcriptomics (SRT) and  
434 single-nucleus RNA-sequencing (snRNA-seq). Analysis of these data identified a population of  
435 norepinephrine (NE) neurons as well as a population of 5-hydroxytryptamine (5-HT, serotonin) neurons,  
436 and spatially localized them within the LC and surrounding region. We evaluated expression of  
437 previously known marker genes for these populations and identified novel sets of significant  
438 differentially expressed (DE) genes, and assessed how their expression varies in space across the  
439 neuroanatomy of the region. We compared our findings from the human LC to molecular profiles of LC  
440 and peri-LC neurons that were previously characterized in rodents using alternative technological  
441 platforms, which confirmed partial conservation of LC-associated genes across these species. Finally,  
442 we validated our results using smFISH RNAscope to assess co-localization of marker genes on  
443 independent tissue sections.

444

445 Identifying genes whose expression is enriched in NE neurons is important because the LC-NE system  
446 is implicated in multiple neuropsychiatric and neurological disorders [4,8], and prominent loss of NE  
447 cells in the LC occurs in neurodegenerative disorders [8–10]. Unbiased analysis of the snRNA-seq and  
448 SRT data identified a number of genes that are enriched in the human LC region and in LC-NE neurons  
449 themselves. As expected, these analyses validated enrichment of genes involved in NE synthesis and  
450 packaging (*TH*, *SLC18A2*, *DBH*) as well as NE reuptake (*SLC6A2*). We also noted expression  
451 selectively in LC-NE neurons of a number of genes whose expression is altered in animal models or in  
452 human disease in the LC (*SSTR2*, *PHOX2A*, *PHOX2B*) [45,46]. We identified LC enrichment of a  
453 number of genes that have been associated at the cellular level with apoptosis, cell loss, or pathology  
454 in the context of neurodegeneration (*RND3*, *P2RY1*) [47–50]. We also noted enrichment of *NT5DC2* in  
455 LC, a gene which has been associated with attention-deficit hyperactivity disorder (ADHD) and  
456 regulates catecholamine synthesis *in vitro* [51,52]. Localization of these genes to the LC in humans,  
457 and LC-NE neurons in particular, may provide important biological insights about physiological function  
458 of these neurons and provide context about underlying mechanistic links between these genes and  
459 disease risk. Future work using the transcriptome-wide molecular expression profiles of NE neurons at  
460 single-nucleus resolution and the LC region at spatial resolution generated here could investigate  
461 associations with individual genes and gene sets from genome-wide association studies (GWAS) for  
462 these disorders as well as genes more generally associated with aging-related processes.

463

464 Our study has several limitations. The SRT data using the 10x Genomics Visium platform captures  
465 around 1-10 cells per measurement location in the human brain, and future studies could apply a  
466 higher-resolution platform to characterize expression at single-cell or sub-cellular spatial resolution. In  
467 the single-nucleus data, we identified a relatively small number of NE neurons, which may be related to  
468 technical factors that affect the recovery of this population due to their relatively large size and fragility.  
469 These technical factors may have also contributed to the unexpectedly high proportion of mitochondrial  
470 reads that we observed in NE neurons in the snRNA-seq data. While mitochondrial reads are not  
471 expected in the nuclear compartment, recent studies reported contamination of nuclear preparations in  
472 snRNA-seq data with ambient mRNAs from abundant cellular transcripts [53]. Given the relatively  
473 elevated energy demand and increased metabolic activity of NE neurons, higher than expected

474 mitochondrial contamination in the nuclear preparation of LC tissue may be plausible. Because NE  
475 neurons were the population of highest interest to profile in this dataset, we opted not to perform QC  
476 filtering on the proportion of mitochondrial reads, in order to retain this population. Further optimizing  
477 technical procedures for cell sorting and cryosectioning to avoid cellular damage, as well as for  
478 straining for large cells, could enhance recovery of this population for future, larger-scale snRNA-seq  
479 studies in this brain region.

480

481 Since the identification of 5-HT neurons in the single-nucleus data was an unexpected finding, the  
482 experimental procedures were not designed to optimally recover this population, and the precise  
483 anatomical origin of the 5-HT neurons recovered in this dataset is not entirely clear. It is possible that  
484 these cells were close to the borders of the LC dissections, residing within the dorsal raphe nucleus,  
485 which is neuroanatomically adjacent to the LC. Supporting this hypothesis, RNAscope data in  
486 **Supplementary Figure 15** from an independent tissue section shows that *TPH2* and *SLC6A4*  
487 expression appears to be distinct from the LC region containing a high density of NE cells. However,  
488 there is some evidence for expression of serotonergic markers within the LC region in rodents  
489 [26,54,55], and our SRT data does support this possibility in the human brain, although further  
490 characterization is needed. Comprehensively understanding the full molecular diversity of 5-HT  
491 neurons in the human brain would require dissections that systematically sample across the extent of  
492 the dorsal raphe nucleus. Similarly, the identification of cholinergic marker gene expression, particularly  
493 the robust expression of *SLC5A7* within NE neurons, was unexpected. While previous studies have  
494 identified small populations of cholinergic interneurons within or adjacent to the LC in rodents [27],  
495 analysis of our data did not classify any of the other neuronal populations as cholinergic per se.  
496 However, both the SRT and RNAscope data (**Supplementary Figure 18**) supports the hypothesis that  
497 expression of cholinergic markers occurs in NE cells themselves, as well as in sparse populations of  
498 cholinergic neurons adjacent to the LC region that do not express NE marker genes. We note that our  
499 snRNA-seq data may be underpowered to fully identify and classify these sparse populations, and  
500 future experiments designed to specifically investigate this finding in more detail could lead to a better  
501 understanding of cholinergic signaling within the LC of the human brain. Similarly, our snRNA-seq may  
502 be underpowered to perform gene set enrichment studies [56] to identify whether the NE and 5-HT  
503 neurons harbor aggregated genetic risk for psychiatric disorders, but these data could be aggregated  
504 with future snRNA-seq data generated from the LC to address this question. To facilitate further  
505 exploration of these data, we provide a freely accessible data resource that includes the snRNA-seq  
506 and SRT data in both web-based and R-based formats, as well as reproducible code for the  
507 computational analysis workflows for the snRNA-seq and SRT data.

508

509



## 510 Materials and Methods

### 511 Postmortem human brain tissue samples for RNAscope, SRT, and snRNA-seq assays

512 Brain donations in the Lieber Institute for Brain Development (LIBD) Human Brain Repository were  
513 collected from the Office of the Chief Medical Examiner of the State of Maryland under the Maryland  
514 Department of Health's IRB protocol #12-24, and from the Western Michigan University Homer Stryker  
515 MD School of Medicine, Department of Pathology, and the Department of Pathology, University of  
516 North Dakota School of Medicine and Health Sciences, both under WCG IRB protocol #20111080.  
517 Clinical characterization, diagnoses, and macro- and microscopic neuropathological examinations were  
518 performed on all samples using a standardized paradigm, and subjects with evidence of macro- or  
519 microscopic neuropathology were excluded. Details of tissue acquisition, handling, processing,  
520 dissection, clinical characterization, diagnoses, neuropathological examinations, RNA extraction, and  
521 quality control measures have been described previously [57,58]. We obtained tissue blocks from 5  
522 male neurotypical brain donors of European ancestry. To select tissue blocks for study inclusion, we  
523 identified the LC in transverse slabs of the pons from fresh-frozen human brain. The LC was identified  
524 through visual inspection of the slab, based on neuroanatomical landmarks and the presence of  
525 neuromelanin pigmentation. For each donor, a tissue block was dissected from the dorsal aspect of the  
526 pons, centered around the LC, using a dental drill. The tissue block was taken at the level of the motor  
527 trigeminal nucleus and superior cerebellar peduncle. Tissue blocks were kept at -80 °C until sectioning  
528 for experiments. We cut 10 µm tissue sections for performing SRT assays using the 10x Genomics  
529 Visium SRT platform [28]. High-resolution images of the H&E stained histology were acquired prior to  
530 on-slide cDNA synthesis and completing the Visium assays. Assays were performed on 2-4 tissue  
531 sections collected from each of the 5 donors, and the tissue blocks were scored to fit 2-3 tissue  
532 sections from the same donor onto a single Visium capture area to maximize the use of the Visium  
533 slides. This resulted in a total of  $N=9$  Visium capture areas (hereafter referred to as samples) in the  
534 SRT dataset. For 3 of the 5 donors, we cut additional 100 µm cryosections for snRNA-seq assays using  
535 the 10x Genomics Chromium snRNA-seq platform [29]. **Supplementary Table 1** provides information  
536 on brain donor demographics as well as sample information for the SRT and snRNA-seq datasets.

### 537 Multiplexed smFISH using RNAscope

538 For RNAscope experiments, tissue blocks were sectioned at 10 µm and single-molecule fluorescent *in*  
539 *situ* hybridization assays were performed with RNAscope technology [32] using the Fluorescent  
540 Multiplex Kit v.2 and 4-plex Ancillary Kit (catalog no. 323100, 323120 ACD) according to the  
541 manufacturer's instructions. Briefly, 10 µm tissue sections (2-4 sections per donor) were fixed with 10%  
542 neutral buffered formalin solution (catalog no. HT501128, Sigma-Aldrich) for 30 min at room  
543 temperature, series dehydrated in increasing concentrations of ethanol (50%, 70%, 100%, and 100%),  
544 pretreated with hydrogen peroxide for 10 min at room temperature and treated with protease IV for  
545 30 min. For QC experiments to confirm LC inclusion in the tissue block (**Figure 1B** showing example for  
546 additional independent donor Br8689), tissue sections were incubated with 3 different probes (2 LC-NE  
547 neuron markers and one pan-neuronal marker): *SLC6A2* (catalog no. 526801-C1, Advanced Cell  
548 Diagnostics) encoding the norepinephrine transporter, *TH* (catalog no. 441651-C2, Advanced Cell  
549 Diagnostics) encoding tyrosine hydroxylase, and *SNAP25* (catalog no. 518851-C3, Advanced Cell  
550 Diagnostics). To confirm co-expression of LC-NE marker genes within individual cells (**Supplementary**  
551 **Figure 11**), we used *SLC6A2* (catalog no. 526801-C1, Advanced Cell Diagnostics), *TH* (catalog no.  
552 441651-C2, Advanced Cell Diagnostics), and *DBH* (catalog no. 545791-C3, Advanced Cell



553 Diagnostics) encoding dopamine beta-hydroxylase. To localize serotonergic and cholinergic markers  
554 within the LC (**Supplementary Figure 15**), we used *TH* (catalog no. 441651-C2, Advanced Cell  
555 Diagnostics) encoding tyrosine hydroxylase, *TPH2* (catalog no. 471451-C1, Advanced Cell  
556 Diagnostics) encoding tryptophan hydroxylase 2, *SLC6A4* (catalog no. 604741-C3, Advanced Cell  
557 Diagnostics) encoding the serotonin transporter, and *SLC5A7* (catalog no. 564671-C4, Advanced Cell  
558 Diagnostics) encoding the high-affinity choline transporter. After probe labeling, sections were stored  
559 overnight in 4x saline-sodium citrate buffer (catalog no. 10128-690, VWR). After amplification steps  
560 (AMP1-3), probes were fluorescently labeled with Opal Dyes 520, 570, and 690 (catalog no.  
561 FP1487001KT, FP1488001KT, and FP1497001KT, Akoya Biosciences; 1:500 dilutions for all the dyes)  
562 and counter-stained with DAPI (4',6-diamidino-2-phenylindole) to label cell nuclei. Lambda stacks were  
563 acquired in z-series using a Zeiss LSM780 confocal microscope equipped with 20x, 0.8 numerical  
564 aperture (NA) and 63x, 1.4 NA objectives, a GaAsP spectral detector, and 405-, 488-, 561- and 633-nm  
565 lasers. All lambda stacks were acquired with the same imaging settings and laser power intensities.  
566 After image acquisition, lambda stacks in z-series were linearly unmixed using Zen Black (weighted; no  
567 autoscale) using reference emission spectral profiles previously created in Zen for the dotdotdot  
568 software (git hash v.4e1350b) [31], stitched, maximum intensity projected, and saved as Carl Zeiss  
569 Image (.czi) files.

## 570 **Visium SRT with H&E staining data generation and sequencing**

571 Tissue blocks were embedded in OCT medium and cryosectioned at 10  $\mu\text{m}$  on a cryostat (Leica  
572 Biosystems). Briefly, Visium Gene Expression Slides were cooled inside the cryostat and tissue  
573 sections were then adhered to the slides. Tissue sections were fixed with methanol and then stained  
574 with hematoxylin and eosin (H&E) according to manufacturer's staining and imaging instructions (User  
575 guide CG000160 Rev C). Images of the H&E stained slides were acquired using a CS2 slide scanner  
576 (Leica Biosystems) equipped with a color camera and a 20x, 0.75 NA objective and saved as a Tagged  
577 Image File (.tif). Following H&E staining and acquisition of images, slides were processed for the  
578 Visium assay according to manufacturer's reagent instructions (Visium Gene Expression protocol User  
579 guide CG000239, Rev D) as previously described [22]. In brief, the workflow includes permeabilization  
580 of the tissue to allow access to mRNA, followed by reverse transcription, removal of cDNA from the  
581 slide, and library construction. Tissue permeabilization experiments were conducted on a single LC  
582 sample used in the study and an optimal permeabilization time of 18 minutes was identified and used  
583 for all sections across donors. Sequencing libraries were quality controlled and then sequenced on the  
584 MiSeq, NextSeq, or NovaSeq Illumina platforms. Sequencing details and summary statistics for each  
585 sample are reported in **Supplementary Table 1**.

## 586 **snRNA-seq data generation and sequencing**

587 Following SRT data collection, three tissue blocks (Br6522, Br8079, and Br2701) were used for snRNA-  
588 seq. Prior to tissue collection for snRNA-seq assays, tissue blocks were further scored based on the  
589 RNAscope and SRT data to enrich tissue collection to the localized site of LC-NE neurons. After  
590 scoring the tissue blocks, samples were sectioned at 100  $\mu\text{m}$  and collected in cryotubes. The sample  
591 collected for Br6522 contained 10 sections, weighing 51 mg, and the samples from Br8079 and Br2701  
592 each contained 15 sections, weighing 60.9 mg and 78.9 mg, respectively. These samples were  
593 processed following a modified version of the 'Frankenstein' nuclei isolation protocol as previously  
594 described [23]. Specifically, chilled EZ lysis buffer (MilliporeSigma) was added to the LoBind  
595 microcentrifuge tube (Eppendorf) containing cryosections, and the tissue was gently broken up, on ice,

596 via pipetting. This lysate was transferred to a chilled dounce, rinsing the tube with additional EZ lysis  
597 buffer. The tissue was then homogenized using part A and B pestles, respectively, for ~10 strokes,  
598 each, and the homogenate was strained through a 70 µm cell strainer. After lysis, the samples were  
599 centrifuged at 500 g at 4 °C for 5 min, supernatant was removed, then the sample was resuspended in  
600 EZ lysis buffer. Following a 5 min incubation, samples were centrifuged again. After supernatant  
601 removal, wash/resuspension buffer (PBS, 1% BSA, and 0.2 U/uL RNasin), was gently added to the  
602 pellet for buffer interchange. After a 5 min incubation, each pellet was again washed, resuspended and  
603 centrifuged three times.

604  
605 For staining, each pellet was resuspended in a wash/resuspension buffer with 3% BSA, and stained  
606 with AF488-conjugated anti-NeuN antibody (MiliporeSigma, catalog no. MAB377X), for 30 min on ice  
607 with frequent, gentle mixing. After incubation, these samples were washed with 1 mL  
608 wash/resuspension buffer, then centrifuged, and after the supernatant was aspirated, the pellet was  
609 resuspended in wash/resuspension buffer with propidium iodide (PI), then strained through a 35 µm cell  
610 filter attached to a FACS tube. Each sample was then sorted on a Bio-Rad S3e Cell Sorter on 'Purity'  
611 mode into a 10x Genomics reverse transcription mix, without enzyme. A range of 5637-9000 nuclei  
612 were sorted for each sample, aiming for an enrichment of ~60% singlet, NeuN+ nuclei. Then the 10x  
613 Chromium reaction was completed following the Chromium Next GEM Single Cell 3' Reagent Kits v3.1  
614 (Dual Index) revision A protocol, provided by the manufacturer (10x Genomics) to generate libraries for  
615 sequencing. The number of sequencing reads and platform used per sample are shown in  
616 **Supplementary Table 1.**

#### 617 **Analysis of Visium SRT data**

618 This section describes additional details on the computational analyses of the Visium SRT data that are  
619 not included in the main text.

620  
621 Manual alignment of the H&E stained histology images to the expression spot grid was performed using  
622 the 10x Genomics Loupe Browser software (v. 5.1.0). The raw sequencing data files (FASTQ files) for  
623 the sequenced library samples were processed using the 10x Genomics Space Ranger software (v.  
624 1.3.0) [59] using the human genome reference transcriptome version GRCh38 2020-A (July 7, 2020)  
625 provided by 10x Genomics. Sequencing summary statistics for each sample are provided in  
626 **Supplementary Table 1.**

627  
628 For spot-level QC filtering, we removed outlier spots that were more than 3 median absolute deviations  
629 (MADs) above or below the median sum of UMI counts or the median number of detected genes per  
630 spot [33]. We did not use the proportion of mitochondrial reads per spot for spot-level QC filtering, since  
631 we observed a high proportion of mitochondrial reads in the NE nuclei in the snRNA-seq data (for more  
632 details, see **Results** and **Supplementary Figure 9**), so using this QC metric would risk removing the  
633 rare population of NE nuclei of interest in the snRNA-seq data. Therefore, for consistency with the  
634 snRNA-seq analyses, we did not use the proportion of mitochondrial reads for spot-level QC filtering in  
635 the SRT data. Due to the large differences in read depth between samples (e.g. median sum of UMI  
636 counts ranged from 118 for sample Br6522\_LC\_2\_round1 to 2,252 for sample Br6522\_LC\_round3; see  
637 **Supplementary Figure 3A** and **Supplementary Table 1** for additional details), we performed spot-  
638 level QC independently within each sample. The spot-level QC filtering identified a total of 287 low-  
639 quality spots (1.4% out of 20,667 total spots) from the  $N=8$  Visium samples that passed sample-level  
640 QC. These spots were removed from subsequent analyses (**Supplementary Figure 3B**). For gene-

641 level QC filtering, we removed low-expressed genes with a total of less than 80 UMI counts summed  
642 across the  $N=8$  Visium samples.

643

644 For the evaluation of the spatially-aware clustering with BayesSpace [35] to identify the LC regions in a  
645 data-driven manner, precision is defined as the proportion of spots in the selected cluster that are from  
646 the true annotated LC region, recall is defined as the proportion of spots in the true annotated LC  
647 region that are in the selected cluster, F1 score is defined as the harmonic mean of precision and recall  
648 (values ranging from 0 to 1, with 1 representing perfect accuracy), and the adjusted Rand index is  
649 defined as the percentage of correct assignments, adjusted for chance (values ranging from 0 for  
650 random assignment to 1 for perfect assignment).

651

652 For the pseudobulked DE testing, we aggregated the reads within the LC and non-LC regions using the  
653 scater package [60], and then used the limma package [61] to calculate empirical Bayes moderated DE  
654 tests.

### 655 **Analysis of snRNA-seq data**

656 This section describes additional details on the computational analyses of the snRNA-seq data that are  
657 not included in the main text.

658

659 We aligned sequencing reads using the 10x Genomics Cell Ranger software [62] (version 6.1.1,  
660 cellranger count, with option `--include-introns`), using the human genome reference transcriptome  
661 version GRCh38 2020-A (July 7, 2020) provided by 10x Genomics. We called nuclei (distinguishing  
662 barcodes containing nuclei from empty droplets) using Cell Ranger (“filtered” outputs), which recovered  
663 8,979, 3,220, and 10,585 barcodes for donors Br2701, Br6522, and Br8079, respectively. We applied  
664 scDbfFinder [39] using default parameters to computationally identify and remove doublets, which  
665 removed 1,022, 205, and 1,366 barcodes identified as doublets for donors Br2701, Br6522, and  
666 Br8079, respectively.

667

668 We performed nucleus-level QC processing by defining low-quality nuclei as nuclei with outlier values  
669 more than 3 median absolute deviations (MADs) above or below the median sum of UMI counts or the  
670 median number of detected genes [33], which did not identify any low-quality nuclei, so all nuclei were  
671 retained. We did not use the proportion of mitochondrial reads for QC processing, since we observed a  
672 high proportion of mitochondrial reads in nuclei with expression of NE neuron markers (*DBH* and *TH*)  
673 (for more details, see **Results** and **Supplementary Figure 10**). Therefore, QC filtering on the  
674 proportion of mitochondrial reads would risk removing the rare population of NE neuron nuclei of  
675 interest. We performed gene-level QC filtering by removing low-expressed genes with less than 30 UMI  
676 counts summed across all nuclei. After doublet removal and QC processing, we obtained a total of  
677 7,957, 3,015, and 9,219 nuclei from donors Br2701, Br6522, and Br8079, respectively.

678

679 For the unsupervised clustering, we used a two-stage clustering algorithm consisting of high-resolution  
680 *k*-means and graph-based clustering that provides sensitivity to identify rare cell populations [33]. For  
681 the first round of clustering (results in **Figure 3A-B**, **Supplementary Figure 13**), we used 2,000  
682 clusters for the *k*-means step, and 10 nearest neighbors and Walktrap clustering for the graph-based  
683 step. For the secondary clustering of inhibitory neurons (**Supplementary Figure 16**), we used 1,000  
684 clusters for the *k*-means step, and 10 nearest neighbors and Walktrap clustering for the graph-based  
685 step. We did not perform any batch integration prior to clustering, since batch integration algorithms

686 may strongly affect rare populations but these algorithms have not yet been independently evaluated  
687 on datasets with rare populations (<1% of cells). We calculated highly variable genes, log-transformed  
688 normalized counts (logcounts), and performed dimensionality reduction using the scater and scran  
689 packages [34,60].

690  
691 For the DE testing, we performed pairwise DE testing between all neuronal clusters, using the  
692 findMarkers() function from the scran package [34]. We tested for genes with log<sub>2</sub>-fold-changes  
693 (log<sub>2</sub>FC) significantly greater than 1 (lfc = 1, direction = “up”) to identify genes with elevated expression  
694 in any of the neuronal clusters compared to all other neuronal clusters.

695  
696 For the spot-level deconvolution using cell2location [41], we used the following parameters for human  
697 brain data from the Visium platform: detection\_alpha = 20, N\_cells\_per\_location = 3.

698  
699

## 700 Supplementary Tables

701

702 **Supplementary Table 1: Summary of experimental design, sample information, and donor**  
703 **demographic details.** Information includes the types of assays performed, donor demographic details,  
704 sample IDs, number of Visium tissue areas per sample, and sequencing summary statistics for each  
705 sample. The table is provided as an .xlsx file.

706

707 **Supplementary Table 2: Differential expression (DE) testing results in pseudobulked Visium**  
708 **SRT data.** Columns include gene ID, gene name, mean log-transformed normalized counts (logcounts)  
709 in manually annotated LC and non-LC regions (“mean\_logcounts\_LC” and “mean\_logcounts\_nonLC”),  
710 log<sub>2</sub> fold change (log<sub>2</sub>FC), p-value, false discovery rate (FDR), and columns identifying significant (FDR  
711 < 0.05 and FC > 2) and highly significant (FDR < 10<sup>-3</sup> and FC > 3) genes. The table is provided as a  
712 .csv file.

713

714 **Supplementary Table 3: Spatially variable genes (SVGs) in Visium SRT data.** Results for SVGs  
715 identified using nnSVG in Visium SRT data. Columns include gene ID, gene name, overall rank of  
716 SVGs identified in replicated tissue areas (“replicated\_overall\_rank”, i.e. top LC-associated SVGs; see  
717 **Results**), overall rank of identified SVGs according to average rank across tissue areas (“overall\_rank”,  
718 i.e. including choroid plexus-associated SVGs from one donor; see **Results**), average rank of identified  
719 SVGs across individual tissue areas (“average\_rank”), number of times (tissue areas) identified within  
720 top 100 SVGs (“n\_withinTop100”), and ranks within each individual tissue area. The table is provided  
721 as a .csv file.

722

723 **Supplementary Table 4: Differential expression (DE) testing results for NE neuron cluster in**  
724 **snRNA-seq data.** DE testing results comparing NE neuron cluster against all other neuronal clusters in  
725 snRNA-seq data. Columns include gene ID, gene name, sum of UMI counts across all nuclei  
726 (“sum\_gene”), average log-transformed normalized counts (logcounts) within the NE neuron cluster  
727 (“self\_average”), average of average logcounts within all other neuronal clusters (“other\_average”),  
728 combined p-value, false discovery rate (FDR), summary log<sub>2</sub> fold change in the pairwise comparison  
729 with the lowest p-value (“summary\_logFC”), and column identifying significant (FDR < 0.05 and FC > 2)  
730 genes. The table is provided as a .csv file.

731

732 **Supplementary Table 5: Differential expression (DE) testing results for 5-HT neuron cluster in**  
733 **snRNA-seq data.** DE testing results comparing 5-HT neuron cluster against all other neuronal clusters  
734 in snRNA-seq data. Columns include gene ID, gene name, sum of UMI counts across all nuclei  
735 (“sum\_gene”), average log-transformed normalized counts (logcounts) within the 5-HT neuron cluster  
736 (“self\_average”), average of average logcounts within all other neuronal clusters (“other\_average”),  
737 combined p-value, false discovery rate (FDR), summary log<sub>2</sub> fold change in the pairwise comparison  
738 with the lowest p-value (“summary\_logFC”), and column identifying significant (FDR < 0.05 and FC > 2)  
739 genes. The table is provided as a .csv file.

740

741



742

## Supplementary Figures

743

### Annotations

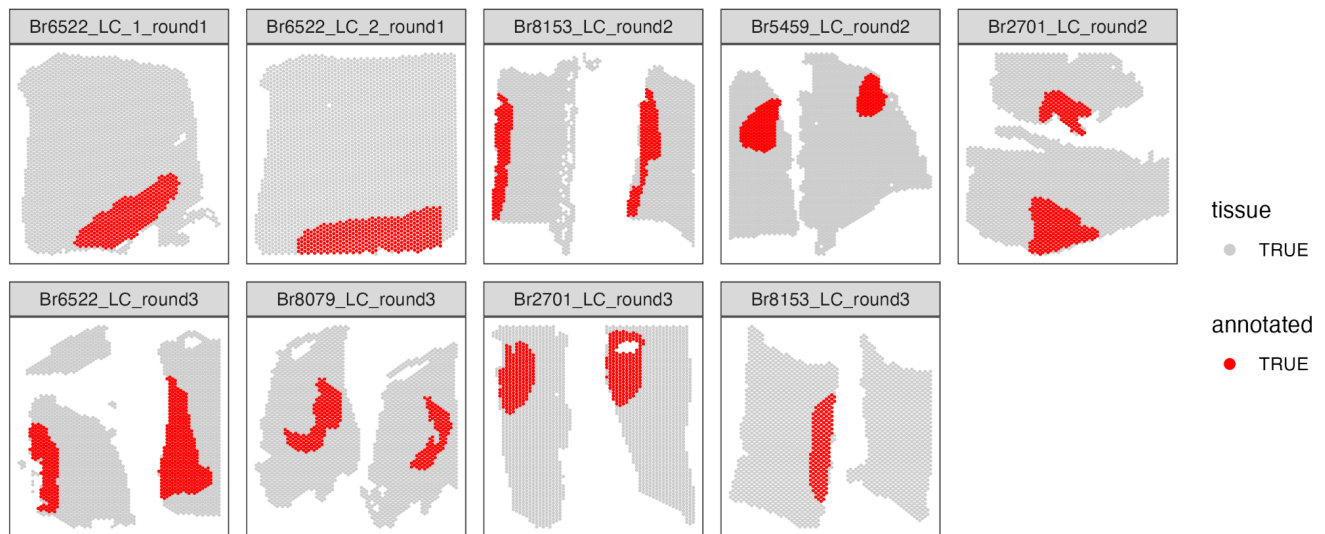

744

745

746

747

748

749

750

751

752

**Supplementary Figure 1: Spot-plot visualizations of manually annotated Visium spots within regions identified as containing LC-NE neurons in SRT data.** For each of the  $N=9$  Visium capture areas (hereafter referred to as samples), the spots were manually annotated as being within the LC regions (red) or within the non-LC regions (gray) based on spots containing NE neurons, which were identified by pigmentation, cell size, and morphology on the H&E stained histology images.



753

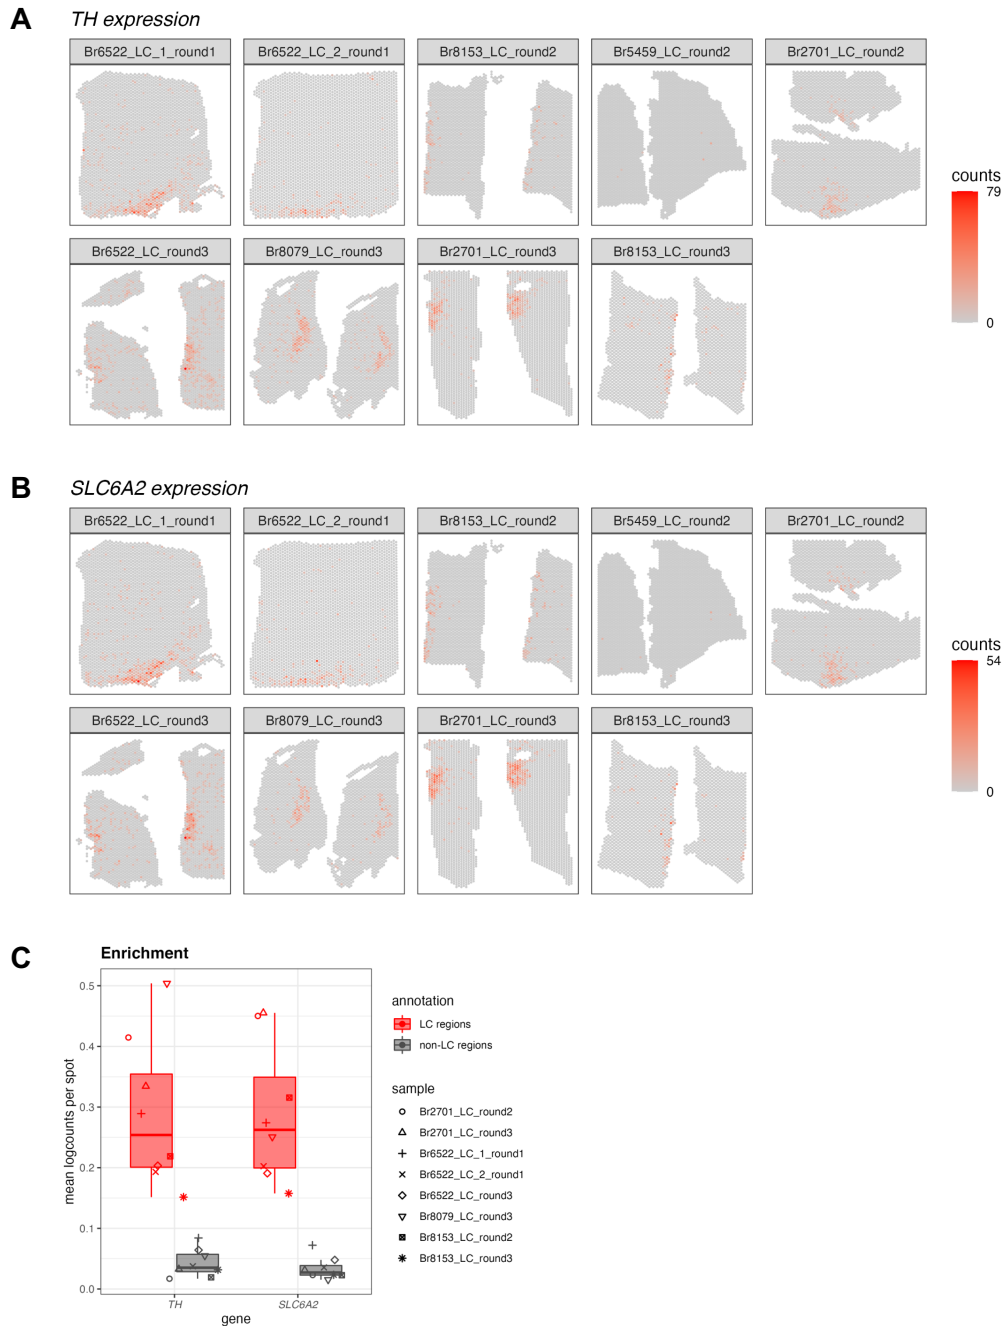

754

755

**Supplementary Figure 2: Spatial expression of two NE neuron-specific marker genes in Visium samples for quality control (QC) in SRT data. (A-B)** Spot-plot visualizations of NE neuron marker gene expression (*TH* and *SLC6A2*, **A** and **B**, respectively) in the  $N=9$  Visium samples. Color scale shows UMI counts per spot. One sample (Br5459\_LC\_round2) did not show clear expression of the NE neuron marker genes. This sample was excluded from subsequent analyses, leaving  $N=8$  Visium capture areas (samples) from 4 out of the 5 donors. **(C)** Enrichment of NE neuron marker gene expression (*TH* and *SLC6A2*) within manually annotated LC regions compared to non-LC regions in the  $N=8$  Visium samples. Boxplots show values as mean log-transformed normalized counts (logcounts) per spot within each region per sample, with samples represented by shapes.

756

757

758

759

760

761

762

763

764

765

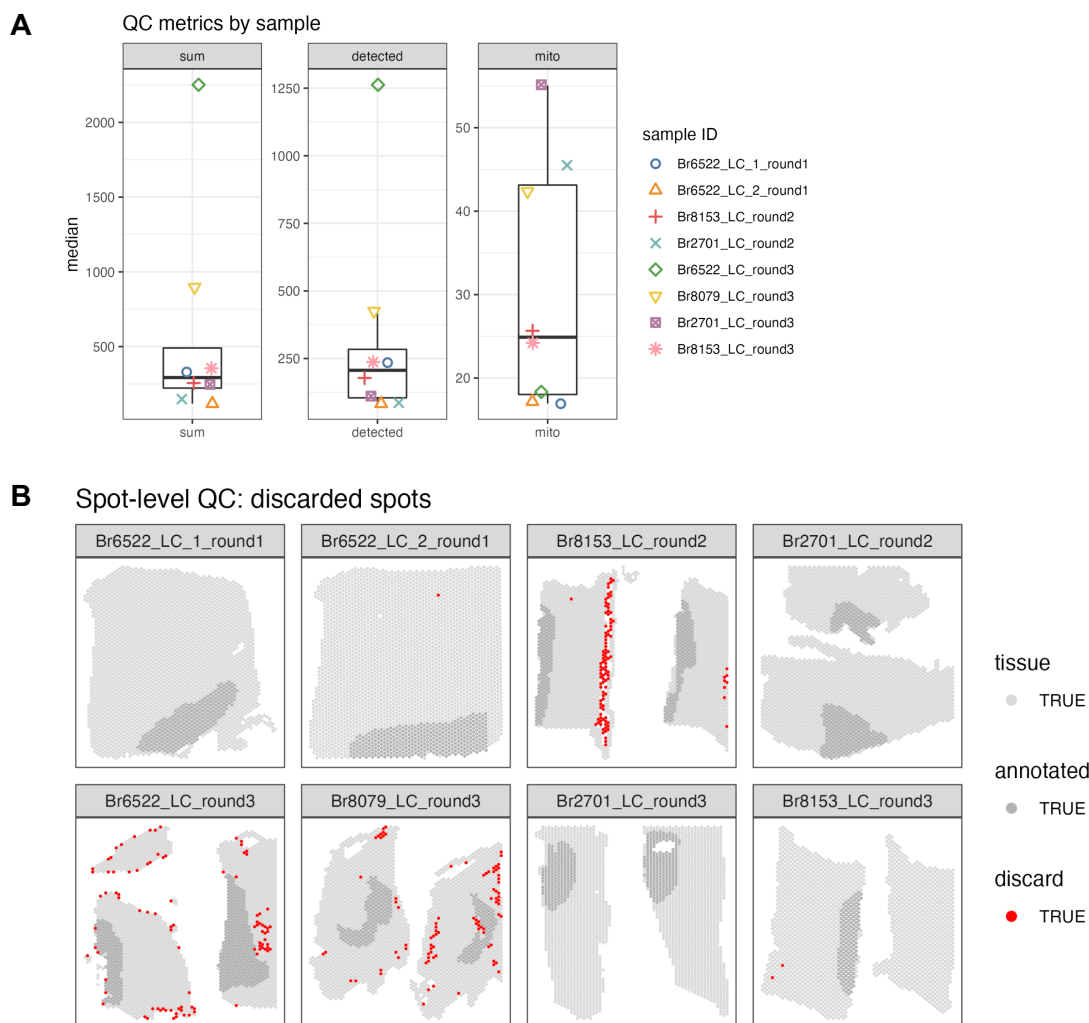

766

767

768

769

770

771

772

773

774

775

**Supplementary Figure 3: Spot-level quality control (QC) data visualizations for Visium samples in SRT data.** (A) QC metrics, medians per sample (from left to right: sum of UMI counts per spot, number of detected genes per spot, and proportion of mitochondrial reads per spot). Boxplots show median for each QC metric per sample, with samples represented by shapes. (B) Applying thresholds of 3 median absolute deviations (MADs) to the sum of UMI counts and number of detected genes for each sample identified a total of 287 low-quality spots (red) (1.4% out of 20,667 total spots), which were removed from subsequent analyses. We did not use the proportion of mitochondrial reads for spot-level QC filtering (see **Methods** for more details).

776

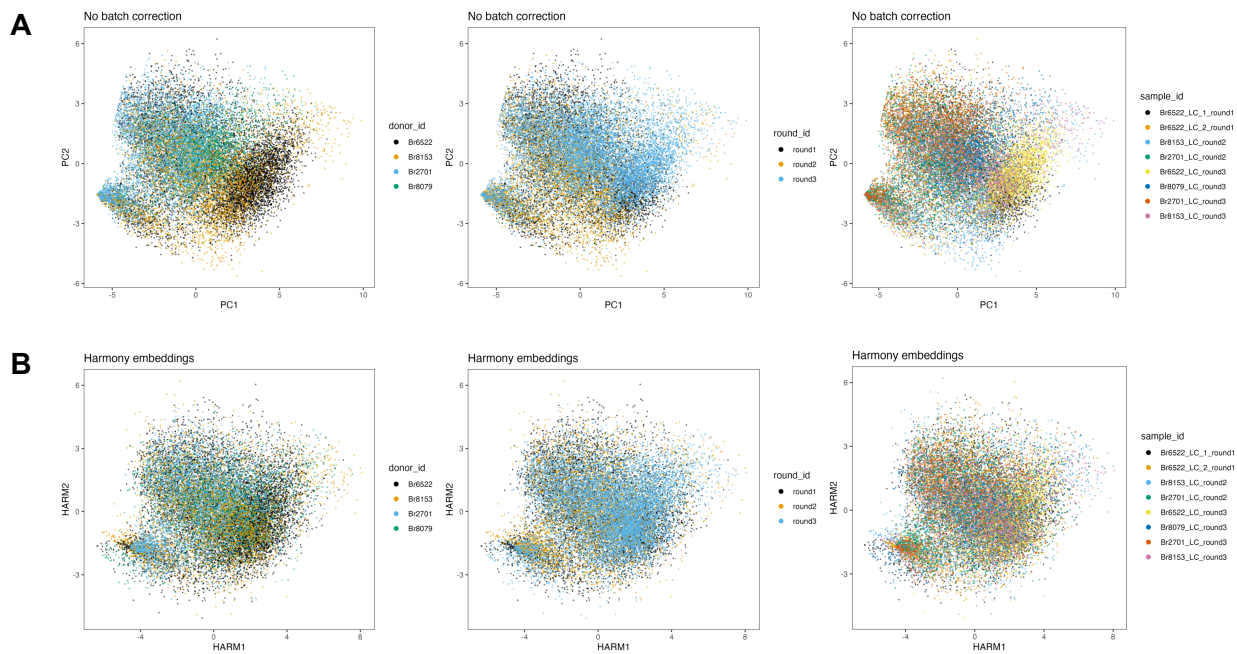

777

778

779

780

781

782

783

784

785

786

787

788

**Supplementary Figure 4: Dimensionality reduction embeddings before and after batch integration across Visium samples in SRT data.** We applied a batch integration tool (Harmony [36]) to remove technical variation in the molecular measurements between the  $N=8$  Visium samples from 4 donors. The integrated measurements were subsequently used as the input for spatially-aware clustering using BayesSpace [35]. **(A)** Principal component analysis (PCA) (top 2 PCs) calculated on molecular expression measurements, with spots labeled (left to right) by donor ID, round ID, and sample ID, without applying any batch integration. **(B)** Harmony embeddings (top 2 Harmony embedding dimensions) after applying Harmony batch integration on sample IDs, with spots labeled (left to right) by donor ID, round ID, and sample ID, demonstrating that the technical variation has been reduced.

789

## A BayesSpace clustering

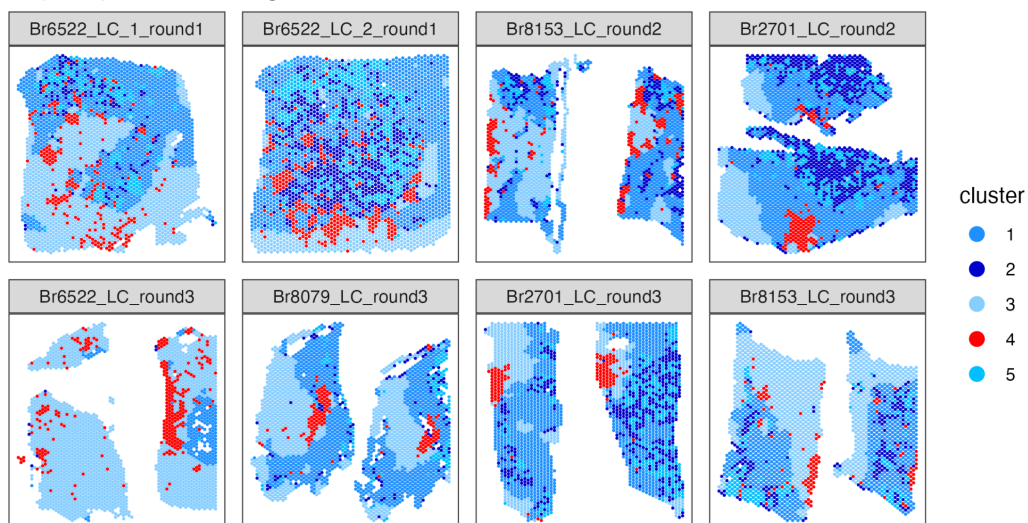

## B Spatially-aware clustering performance

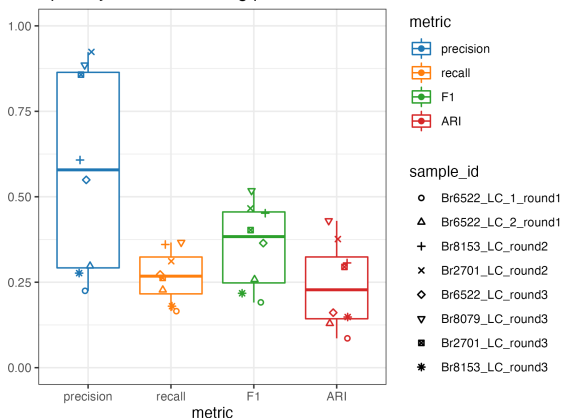

790

791

### Supplementary Figure 5: Identifying LC and non-LC regions in a data-driven manner by spatially-aware

792

unsupervised clustering in SRT data. We applied a spatially-aware unsupervised clustering algorithm

793

(BayesSpace [35]) to investigate whether the LC and non-LC regions in each Visium sample could be annotated

794

in a data-driven manner. (A) Using BayesSpace with  $k=5$  clusters, we clustered spots from the  $N=8$  Visium

795

samples using the Harmony batch-integrated molecular measurements. Cluster 4 (red) corresponds most closely

796

to the manually annotated LC regions. (B) BayesSpace clustering performance evaluated in terms of

797

concordance between cluster 4 (red) and the manually annotated LC region in each sample. Clustering

798

performance was evaluated in terms of precision, recall, F1 score, and adjusted Rand index (ARI) (see **Methods**

799

for definitions).

800

801

802

## A Annotations

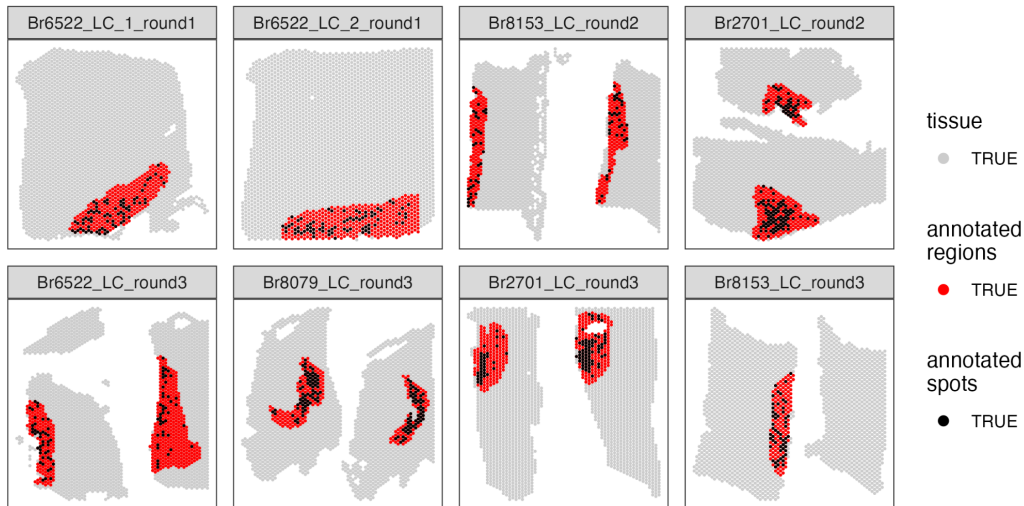

## B

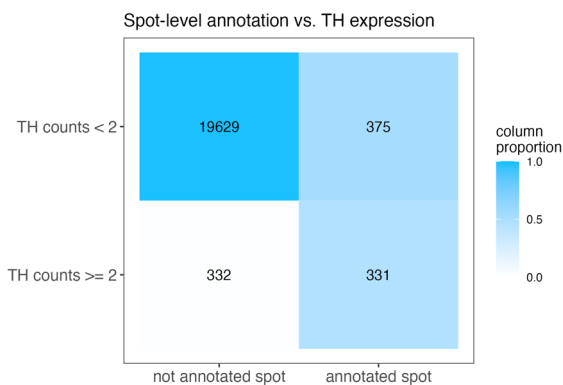

803

804 **Supplementary Figure 6: Comparison of spot-level and region-level manual annotations in SRT data. (A)**

805 We manually annotated individual Visium spots (black) overlapping with NE neuron cell bodies within the  
806 previously manually annotated LC regions (red), based on pigmentation, cell size, and morphology from the H&E  
807 stained histology images, in the  $N=8$  Visium samples. (B) We observed relatively low overlap between spots with  
808 expression of the NE neuron marker gene *TH* ( $\geq 2$  observed UMI counts per spot) and the set of annotated  
809 individual spots. The differences included both false positives (annotated spots that were not *TH+*) and false  
810 negatives (*TH+* spots that were not annotated). Therefore, we did not use the spot-level annotations for  
811 subsequent analyses, and instead used the LC region-level annotations for all further analyses.

812

813

814

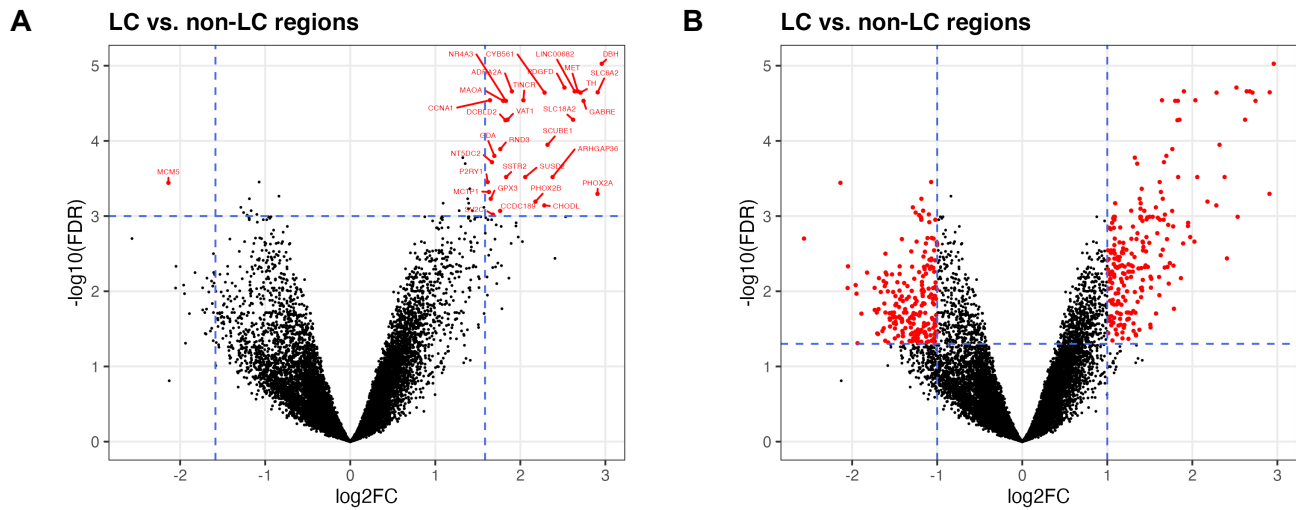

815

816

817

818

819

820

821

822

823

824

825

**Supplementary Figure 7: Results from differential expression (DE) analysis to identify expressed genes associated with LC regions in SRT data.** We performed DE testing between the manually annotated LC and non-LC regions by pseudobulking spots, defined as aggregating UMI counts from the combined set of spots, within the annotated LC and non-LC regions in each sample. **(A)** Using a false discovery rate (FDR) significance threshold of  $10^{-3}$  and an expression fold-change (FC) threshold of 3 (dashed blue lines), we identified 32 highly significant genes (red points). **(B)** Using standard significance thresholds of  $FDR < 0.05$  and expression  $FC > 2$ , we identified 437 significant genes (red). Vertical axes are on reversed  $\log_{10}$  scale, and horizontal axes are on  $\log_2$  scale. Additional details are provided in **Supplementary Table 2**.



826

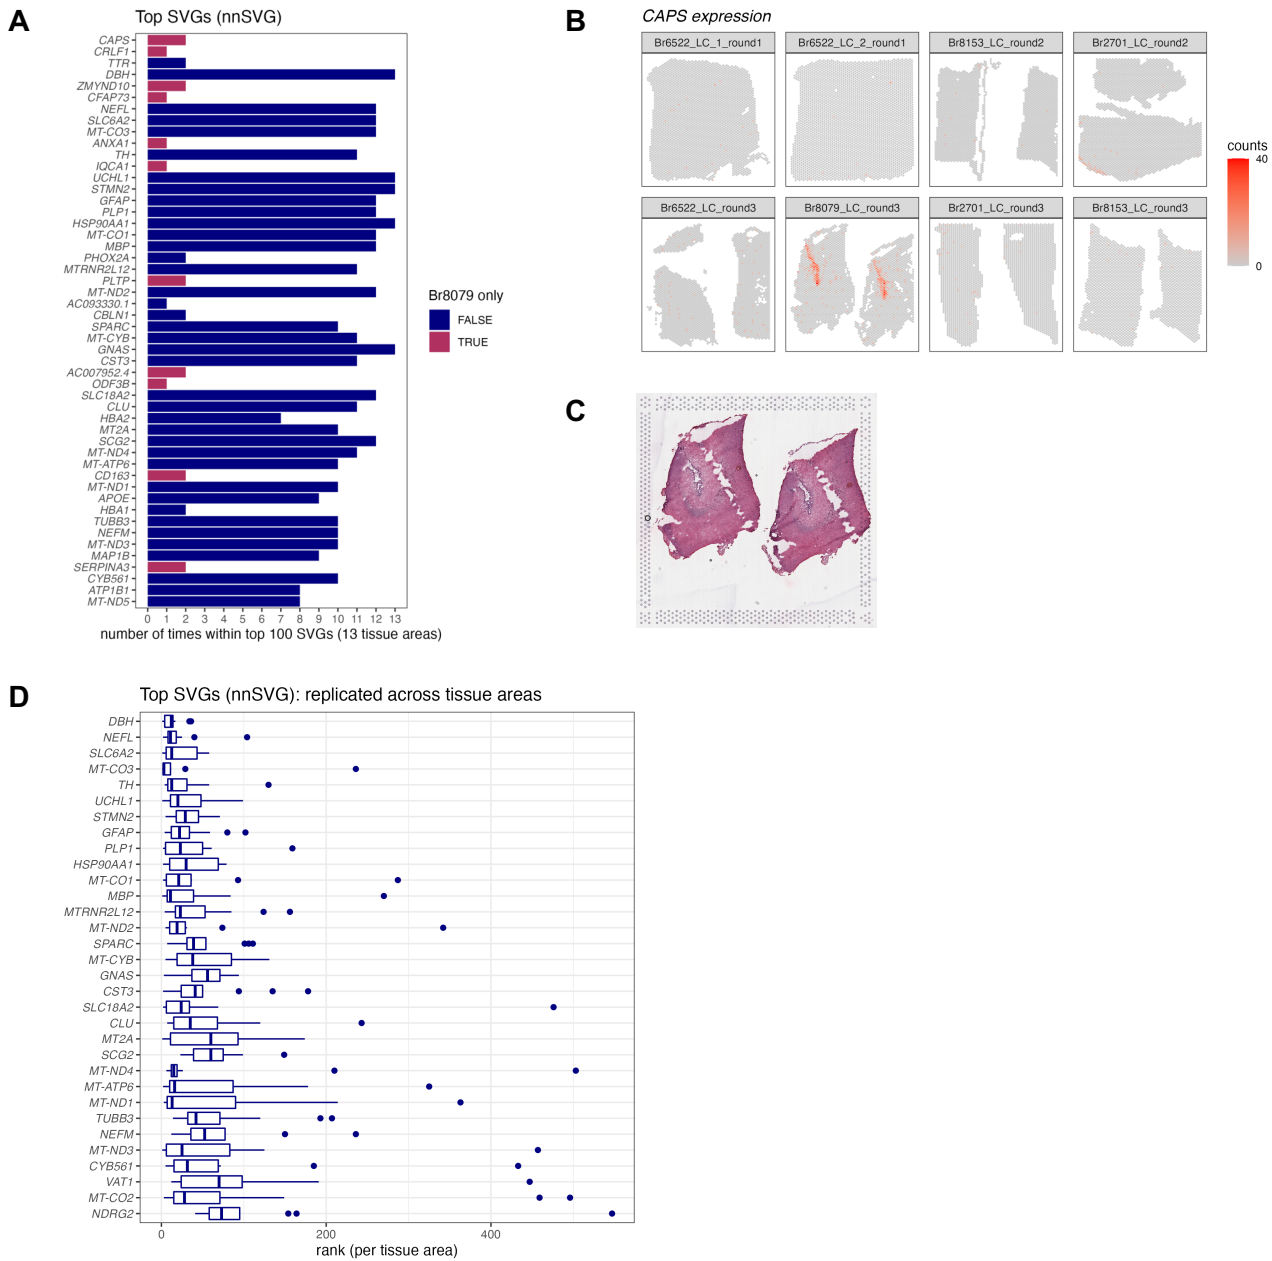

827 **Supplementary Figure 8: Results from applying nnSVG to identify spatially variable genes (SVGs) in SRT**  
 828 **data.** We applied nnSVG [38], a method to identify spatially variable genes (SVGs), in the Visium SRT samples.  
 829 We ran nnSVG within each contiguous tissue area containing a manually annotated LC region (13 tissue areas in  
 830 the  $N=8$  Visium samples) and calculated an overall ranking of top SVGs by averaging the ranks per gene from  
 831 each tissue area. **(A)** The top 50 ranked SVGs from this analysis included a subset (11 out of 50) of genes that  
 832 were highly ranked in samples from only one donor (Br8079, genes highlighted in maroon). We determined that  
 833 this was due to the inclusion of a section of the choroid plexus adjacent to the LC for this donor. Bars show the  
 834 number of times (out of 13 tissue areas) each gene was included within the top 100 SVGs. Rows are ordered by  
 835 overall average ranking in descending order. **(B)** Spatial expression of *CAPS*, a choroid plexus marker gene, in  
 836 the  $N=8$  Visium samples. **(C)** Histology image showing the two tissue areas for sample Br8079\_LC\_round3. **(D)** In  
 837 order to focus on LC-associated SVGs, we calculated an overall average ranking of SVGs that were each  
 838 included within the top 100 SVGs in at least 10 out of the 13 tissue areas, which identified 32 highly-ranked,  
 839 replicated LC-associated SVGs. Boxplots show the ranks in each tissue area. Rows are ordered by the overall  
 840 average ranking in descending order.

841

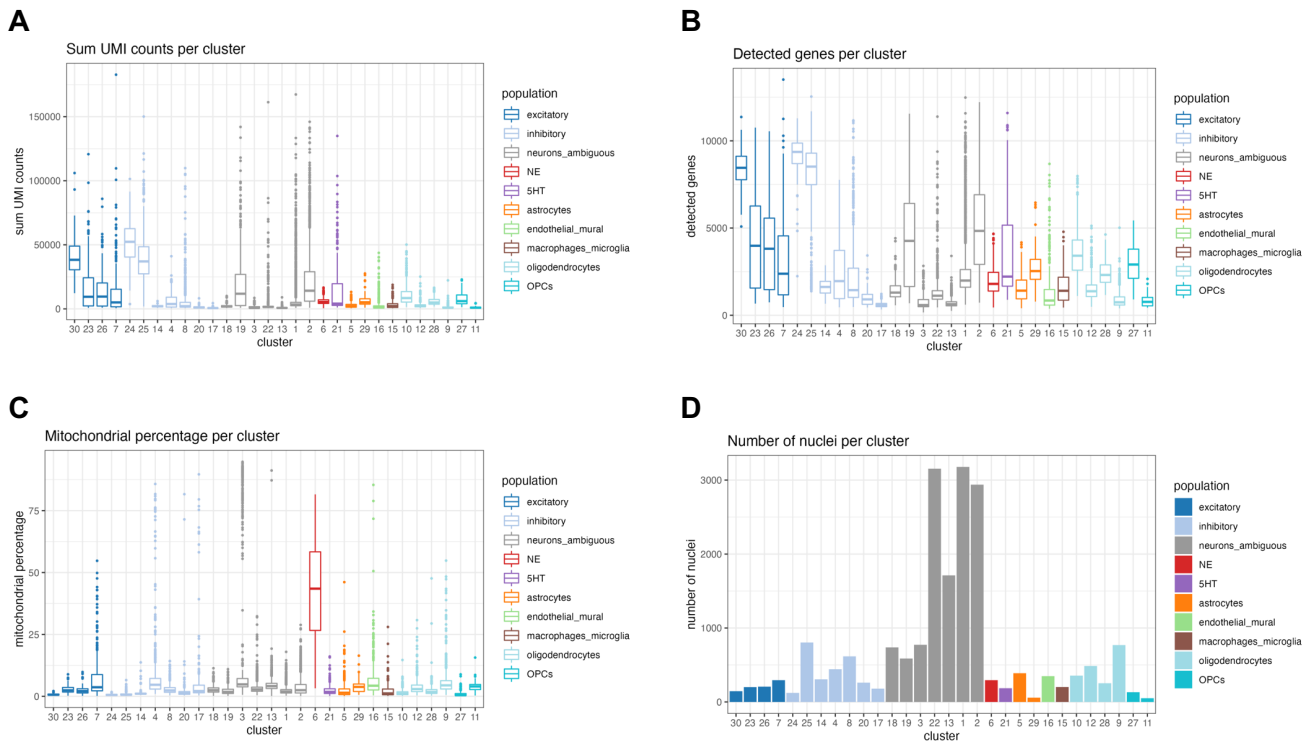

842

843

**Supplementary Figure 9: Distribution of nucleus-level quality control (QC) metrics across unsupervised clusters in snRNA-seq data. (A)** Sum of UMI counts per nucleus and cluster, **(B)** total number of detected genes per nucleus and cluster, **(C)** percentage of mitochondrial reads per nucleus and cluster, and **(D)** number of nuclei per cluster. We observed an unexpectedly high percentage of mitochondrial reads in the NE neuron cluster (cluster 6, red, **C**). Since NE neurons were of particular interest for analysis, we did not remove nuclei with a high percentage of mitochondrial reads during QC filtering.

844

845

846

847

848

849

850

851

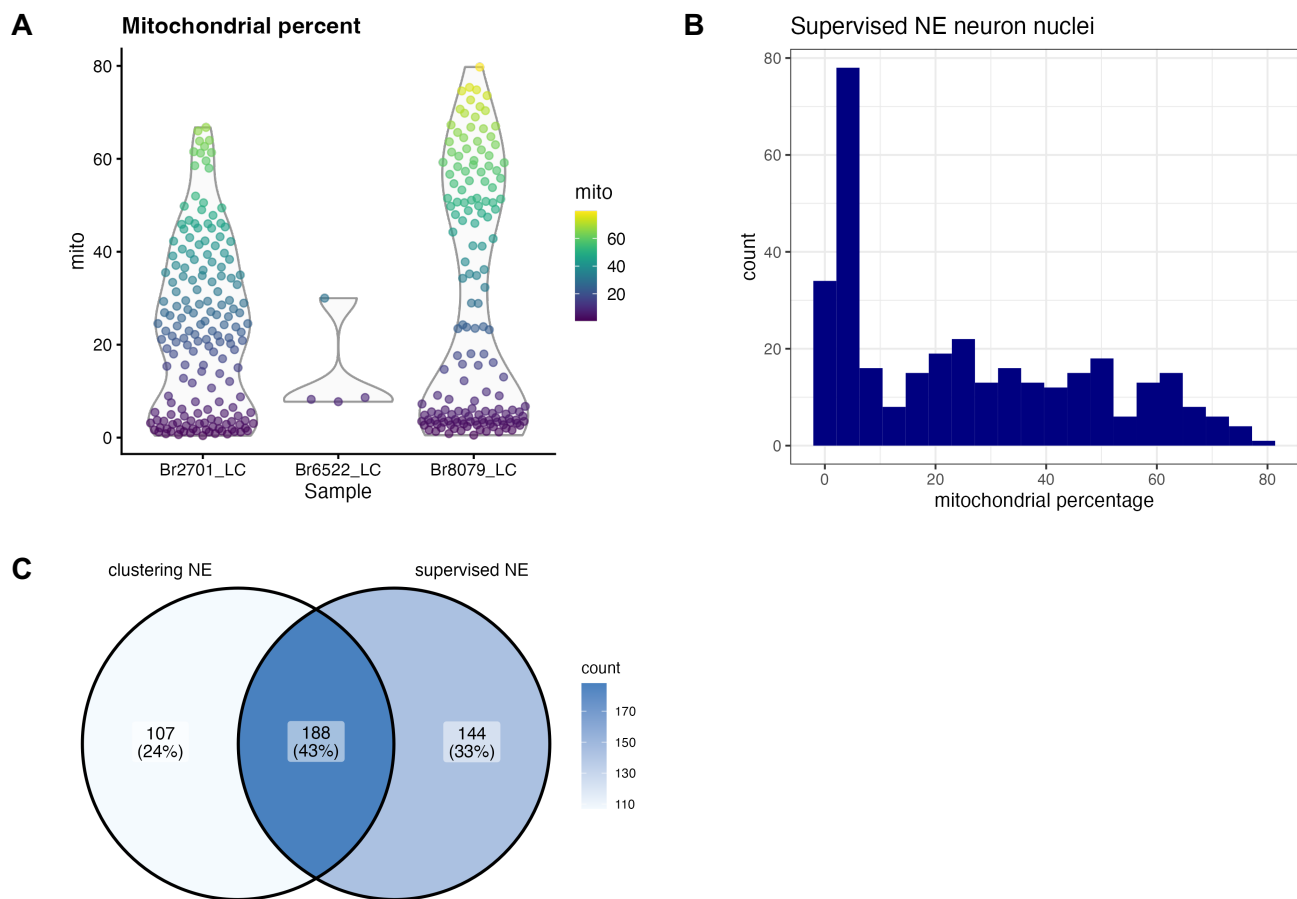

852

853 **Supplementary Figure 10: Supervised identification of NE neuron nuclei by thresholding on expression of**  
854 **NE neuron marker genes in snRNA-seq data.** We applied a supervised strategy to identify NE neuron nuclei by  
855 simply thresholding on expression of NE neuron marker genes (selecting nuclei with  $\geq 1$  UMI counts of both *DBH*  
856 and *TH*). We observed a higher than expected proportion of mitochondrial reads within this set of nuclei, and did  
857 not filter on this parameter during QC processing, in order to retain these nuclei. **(A)** Percentage of mitochondrial  
858 reads within the supervised set of nuclei by donor (Br2701, Br6522, and Br8079). **(B)** Histogram showing  
859 percentage of mitochondrial reads within the supervised set of nuclei across all donors. **(C)** Venn diagram  
860 showing overlap between NE neuron cluster identified by unsupervised clustering (left) and NE neuron population  
861 identified by supervised thresholding (right). Values display number of nuclei.

862

863

864

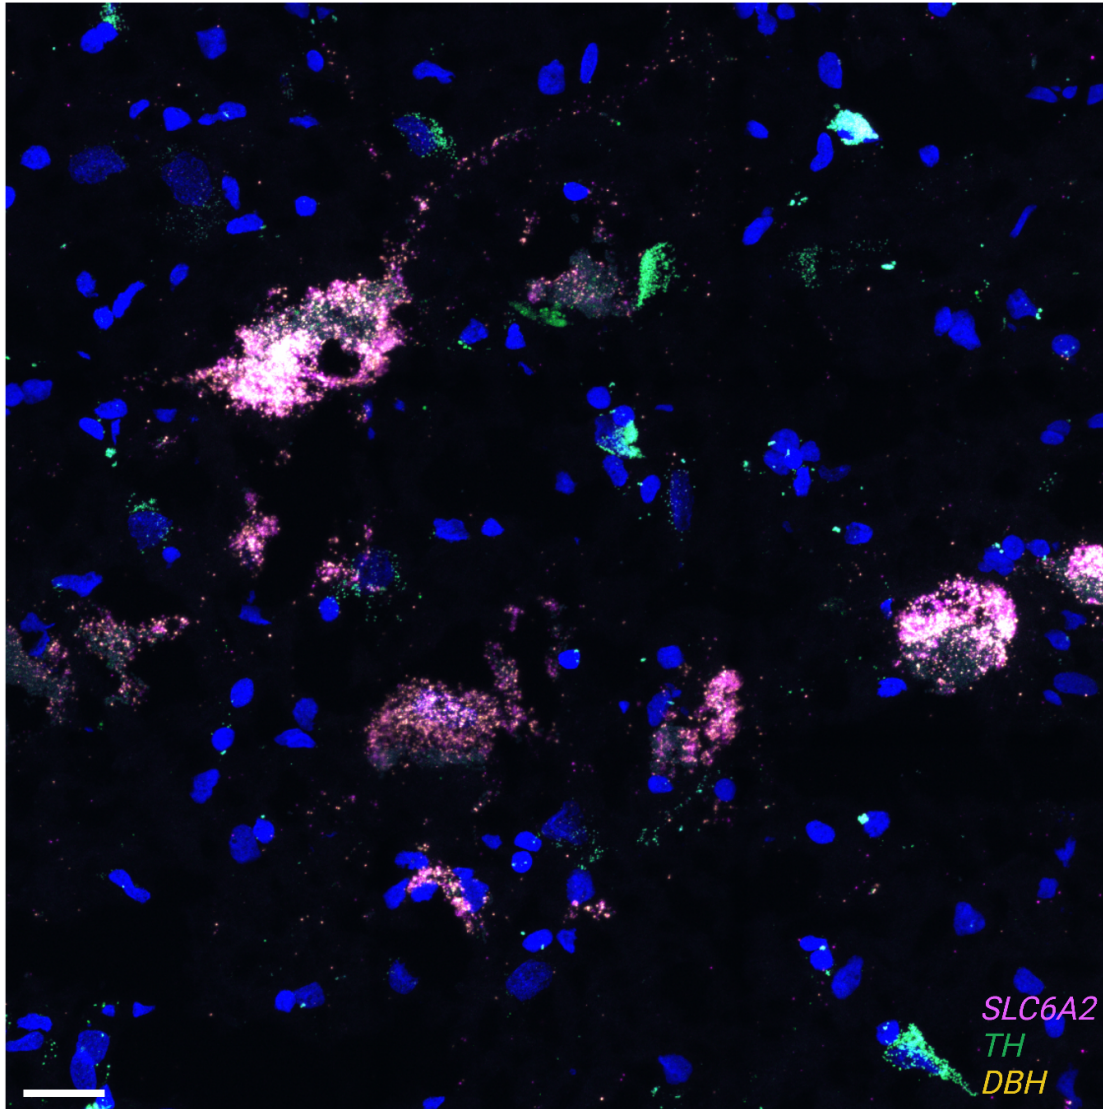

865

866

867

868

869

870

871

872

873

874

875

**Supplementary Figure 11: Expression of NE neuron marker genes in individual cells using RNAscope and high-magnification confocal imaging.** We applied RNAscope [32] and high-magnification confocal imaging to visualize expression of NE neuron marker genes (*DBH* in yellow, *TH* in green, and *SLC6A2* in pink, with white representing all three colors overlapping) and DAPI stain for nuclei (blue) on additional tissue sections from an additional independent donor, Br8689. The figure displays a region from a single tissue section, demonstrating clear co-localization of expression of the three NE neuron marker genes (white points) within individual cells. Scale bar: 20  $\mu\text{m}$ .

876

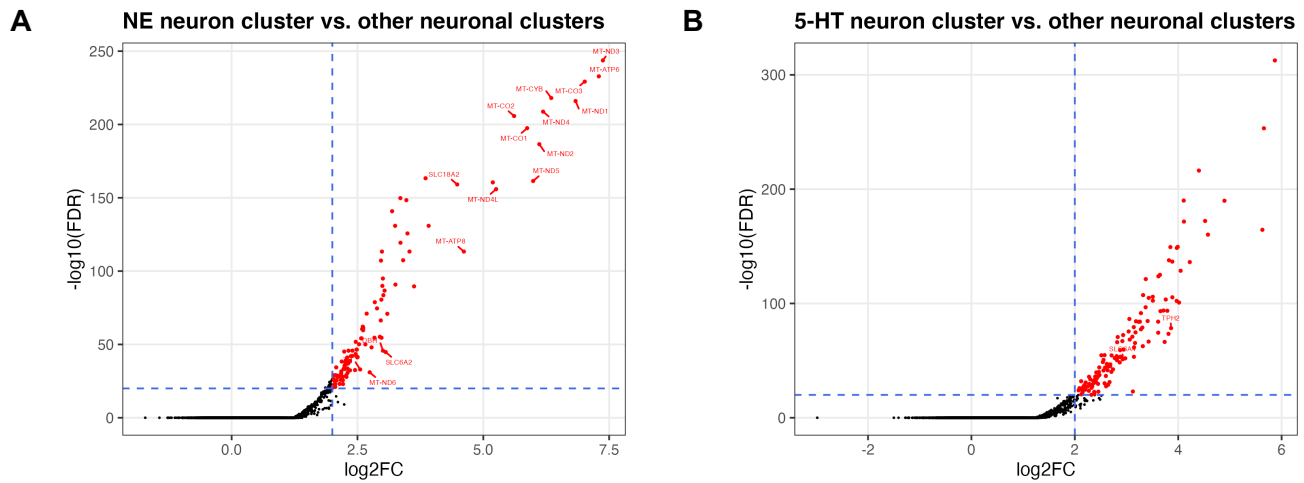

877

878 **Supplementary Figure 12: DE testing results between neuronal clusters in the LC and surrounding region**  
879 **in snRNA-seq data. (A)** Volcano plot showing 327 statistically significant DE genes (FDR < 0.05 and FC > 2)  
880 elevated in expression within the NE neuron cluster compared to all other neuronal clusters captured in this  
881 region. The significant DE genes include known NE neuron marker genes (*DBH*, *TH*, *SLC6A2*, and *SLC18A2*)  
882 and mitochondrial genes. **(B)** Volcano plot showing 361 statistically significant DE genes (FDR < 0.05 and FC > 2)  
883 elevated in expression within the 5-HT neuron cluster compared to all other neuronal clusters captured in this  
884 region. The significant DE genes include known 5-HT neuron marker genes (*TPH2* and *SLC6A4*). Vertical axes  
885 are on reversed log<sub>10</sub> scale, and horizontal axes are on log<sub>2</sub> scale. Additional details are provided in  
886 **Supplementary Tables 4, 5.**

887

888

889

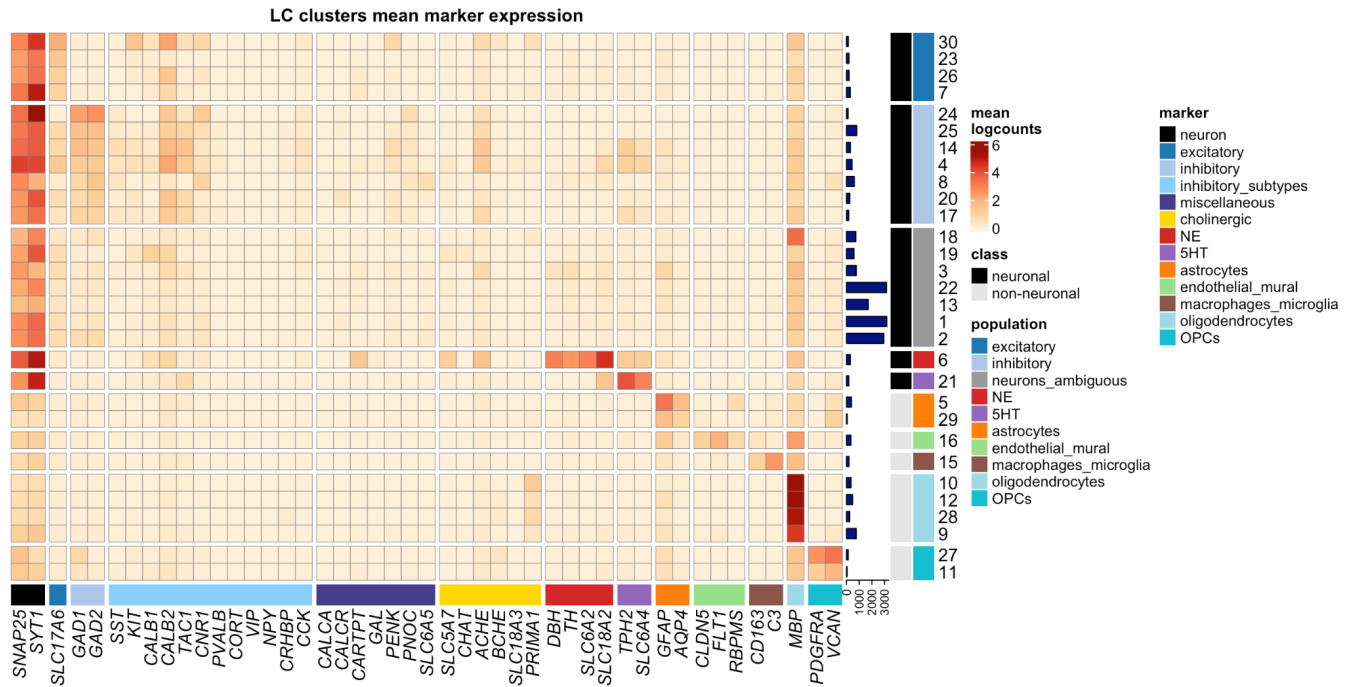

890

891

892

893

894

895

896

897

898

899

900

**Supplementary Figure 13: Unsupervised clustering results showing additional inhibitory neuronal, miscellaneous, and cholinergic marker genes in snRNA-seq data.** Extended form of heatmap displayed in **Figure 3A**, showing additional inhibitory neuronal marker genes (light blue), miscellaneous marker genes including neuropeptides and receptors included for comparison with [27] (dark blue-purple), and cholinergic marker genes (yellow). We observed diversity in expression of inhibitory neuronal marker genes across inhibitory neuronal subpopulations (additional results in **Supplementary Figure 16**), and we observed expression of cholinergic marker genes within NE neurons (additional results in **Supplementary Figure 18**).



901

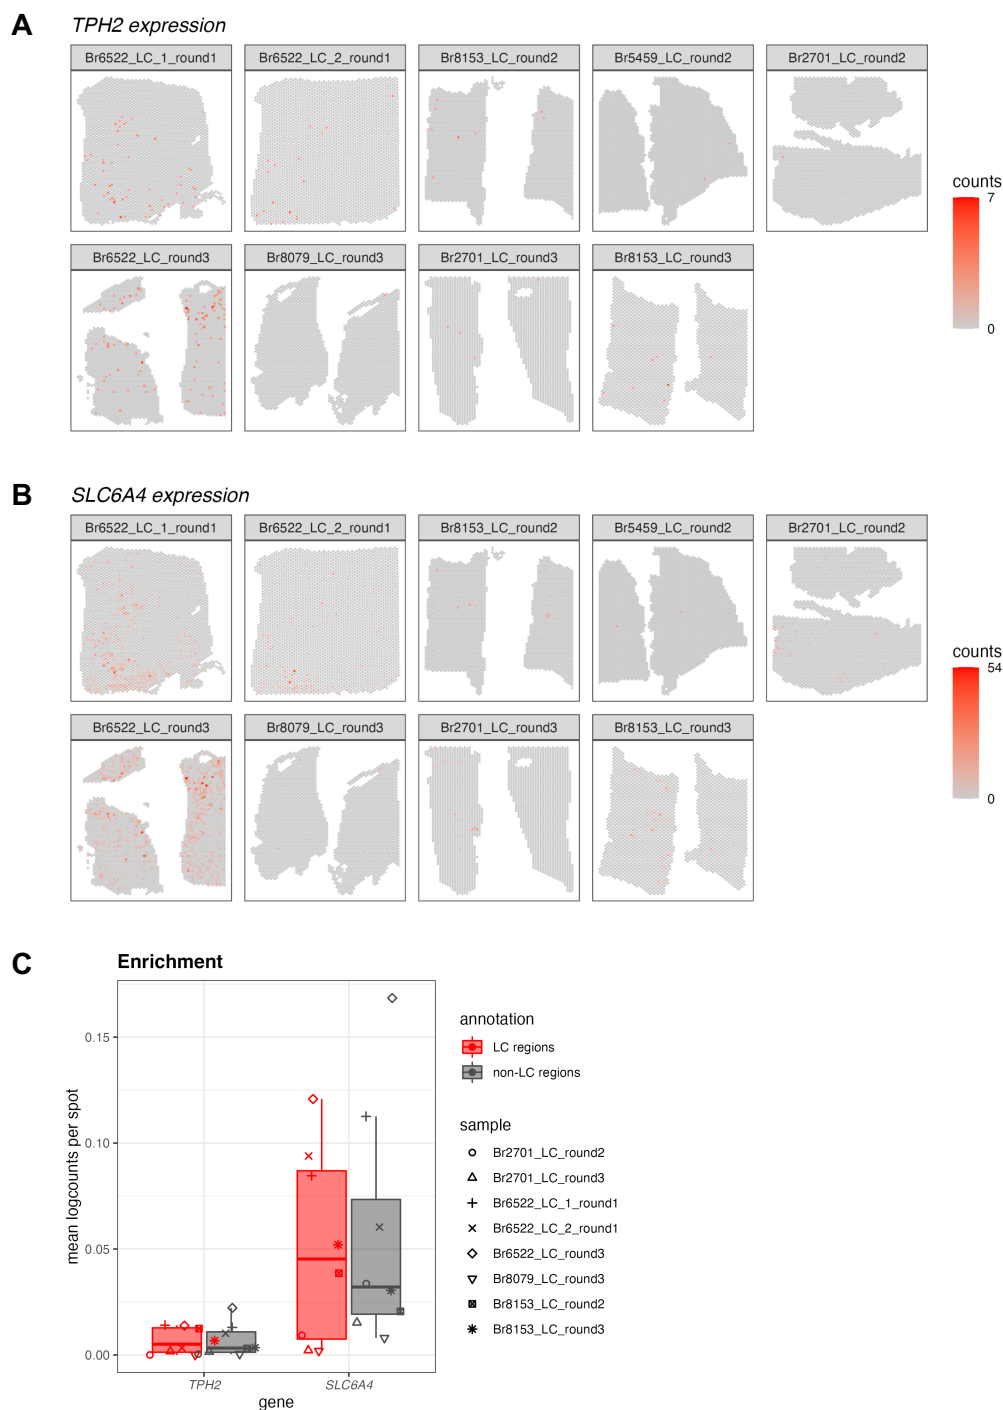

902

903

904

905

906

907

908

909

910

**Supplementary Figure 14: Spatial expression and enrichment analysis of 5-HT neuron marker genes in Visium SRT samples.** (A-B) We visualized the spatial expression of 5-HT (5-hydroxytryptamine or serotonin) neuron marker genes (*TPH2* and *SLC6A4*) in the  $N=9$  initial Visium SRT samples within the Visium SRT samples, which showed that the population of 5-HT neurons was distributed across both the LC and non-LC regions. (C) Enrichment of 5-HT neuron marker gene expression (*TPH2* and *SLC6A4*) within manually annotated LC regions compared to non-LC regions in the  $N=8$  Visium SRT samples. Boxplots show values as mean log-transformed normalized counts (logcounts) per spot within each region per sample, with samples represented by shapes.

911

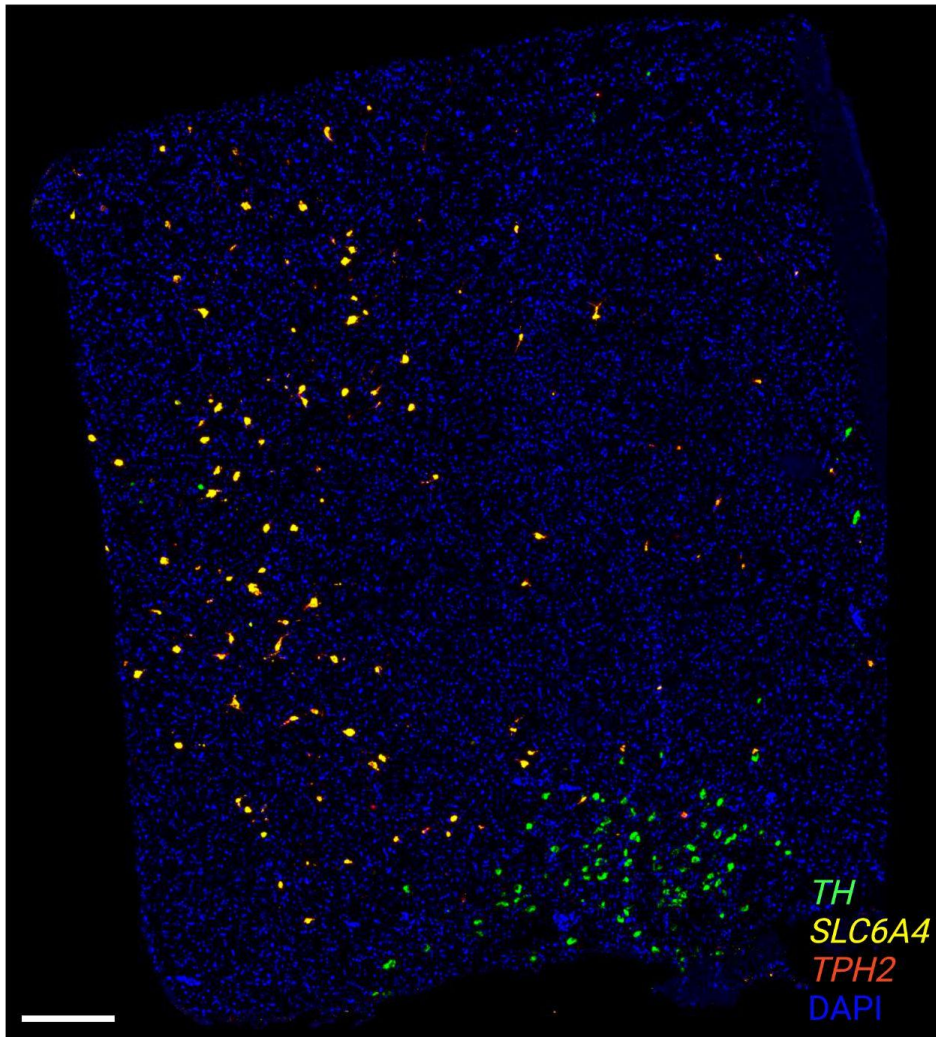

912

913

914 **Supplementary Figure 15: Expression of NE neuron and 5-HT neuron marker genes using RNAscope.** We  
915 applied RNAscope [32] to visualize expression of an NE neuron marker gene (*TH*) as well as 5-HT neuron marker  
916 genes (*TPH2* and *SLC6A4*) within an additional tissue section from donor Br6522, demonstrating that the NE and  
917 5-HT marker genes were expressed within distinct cells and that the NE and 5-HT neuron populations were not  
918 localized within the same regions. Scale bar: 500  $\mu$ m.

919

920

921

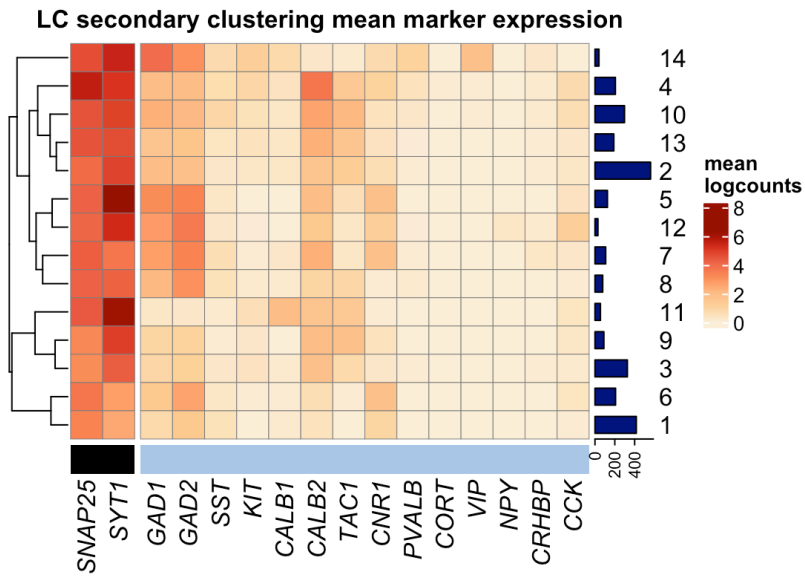

922

923

924

925

926

927

928

929

930

931

932

**Supplementary Figure 16: Inhibitory neuronal subpopulations identified by secondary unsupervised clustering on inhibitory neurons in snRNA-seq data.** We applied a secondary round of unsupervised clustering to the inhibitory neuron nuclei identified in the first round of clustering. This identified 14 clusters representing inhibitory neuronal subpopulations. Heatmap displays expression of neuronal marker genes (black) and inhibitory neuron marker genes (light blue) (columns) in the 14 clusters (rows). Cluster IDs are shown in labels on the right, and numbers of nuclei per cluster are shown in horizontal bars on the right. Heatmap values represent mean log-transformed normalized counts (logcounts) per cluster.

933

**A** Cluster 6

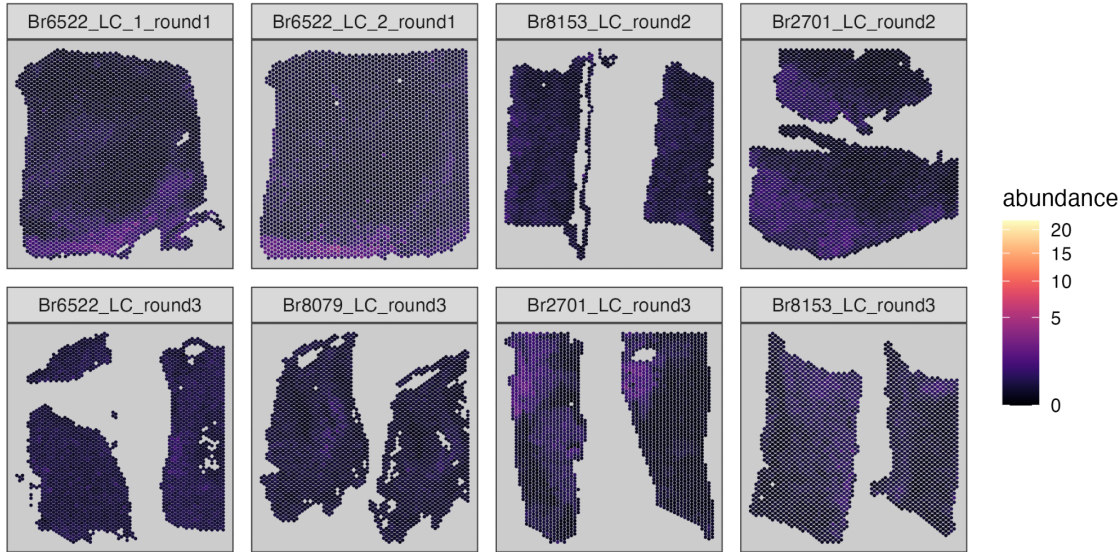

**B** Cluster 21

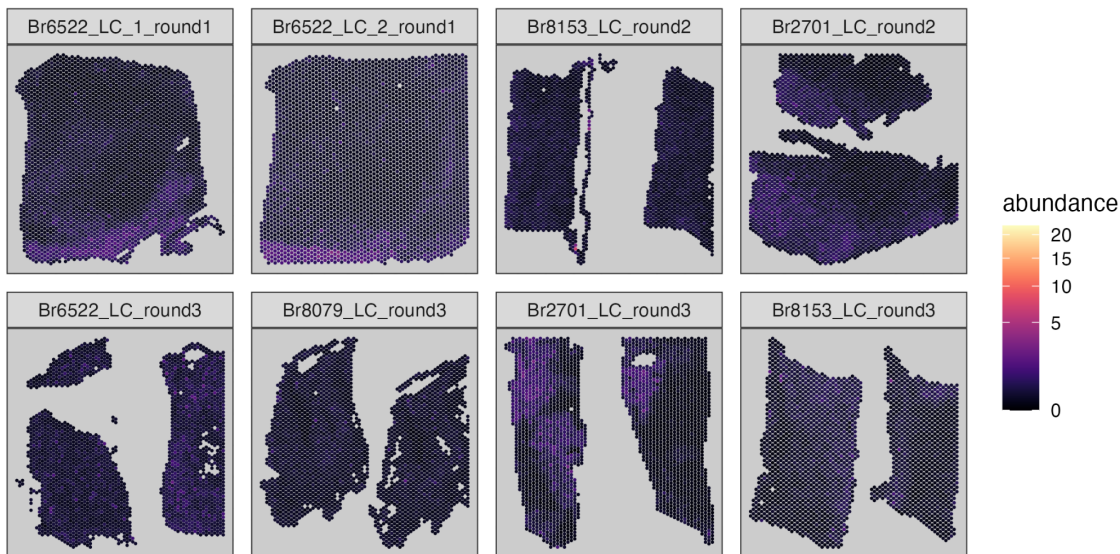

934

935

936

937

938

939

940

941

942

943

**Supplementary Figure 17: Spot-level deconvolution to map the spatial coordinates of snRNA-seq populations within the Visium SRT samples.** We applied a spot-level deconvolution algorithm (cell2location [41]) to integrate the snRNA-seq and SRT data by estimating the cell abundance of the snRNA-seq populations, which are used as reference populations, at each spatial location (spot) in the Visium SRT samples. This correctly mapped **(A)** NE neurons (cluster 6) and **(B)** 5-HT neurons (cluster 21) to the spatial regions where these populations were previously identified based on expression of marker genes (**Supplementary Figures 2 and 14**). However, the estimated absolute cell abundance of these populations per spot was higher than expected.



944

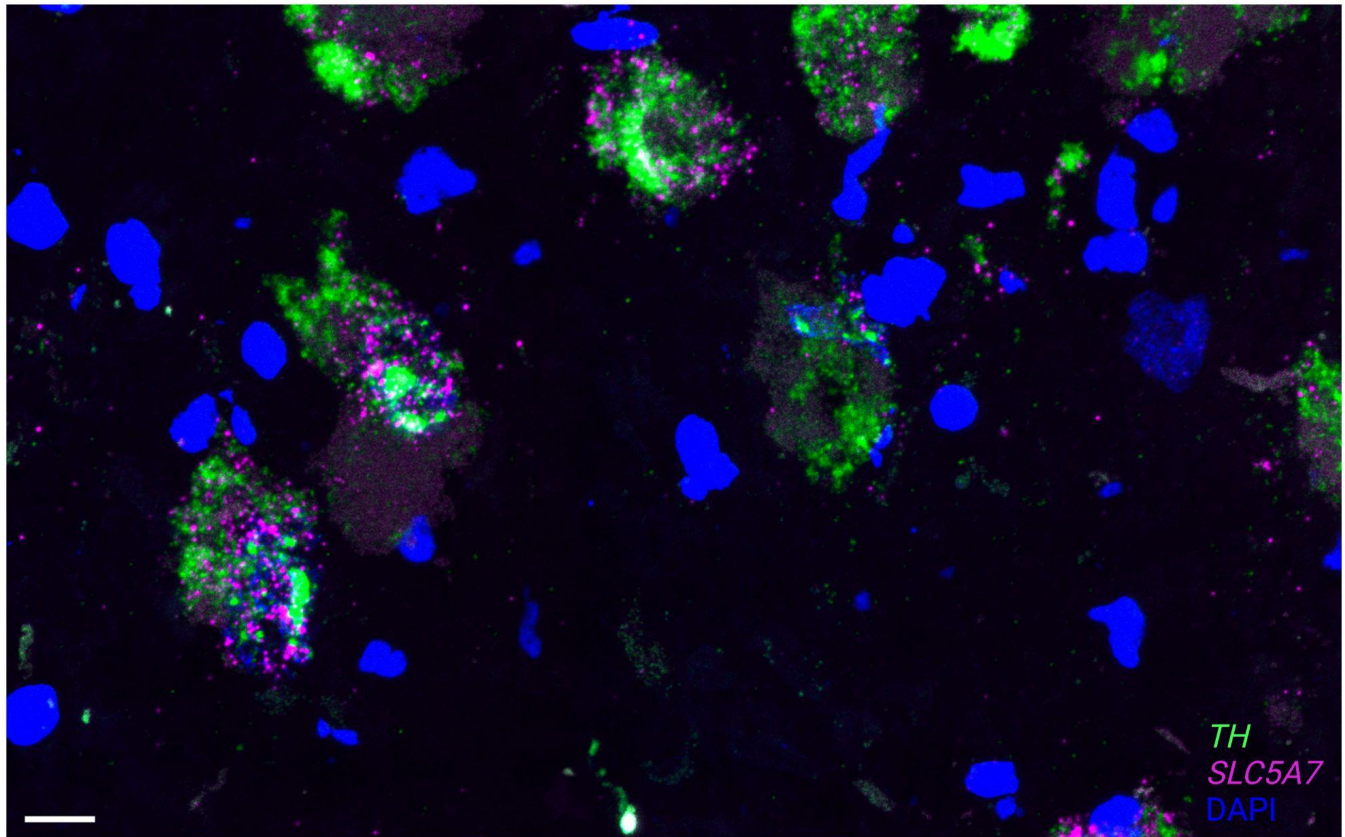

945  
946  
947  
948  
949  
950  
951  
952  
953  
954

**Supplementary Figure 18: High-resolution images demonstrating co-expression of cholinergic marker gene within NE neurons.** We applied RNAscope [32] and high-resolution imaging at 63x magnification to visualize expression of *SLC5A7* (cholinergic marker gene encoding the high affinity choline transporter, shown in pink) and *TH* (NE neuron marker gene encoding tyrosine hydroxylase, shown in green), and DAPI stain for nuclei (blue), in a tissue section from donor Br8079. This confirmed co-expression of *SLC5A7* and *TH* within individual cells. Scale bar: 25  $\mu\text{m}$ .



955

**A** *SLC5A7* expression

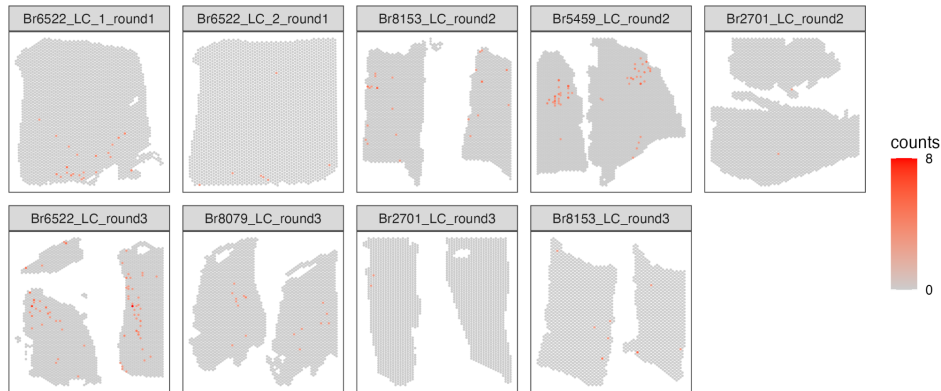

**B** *ACHE* expression

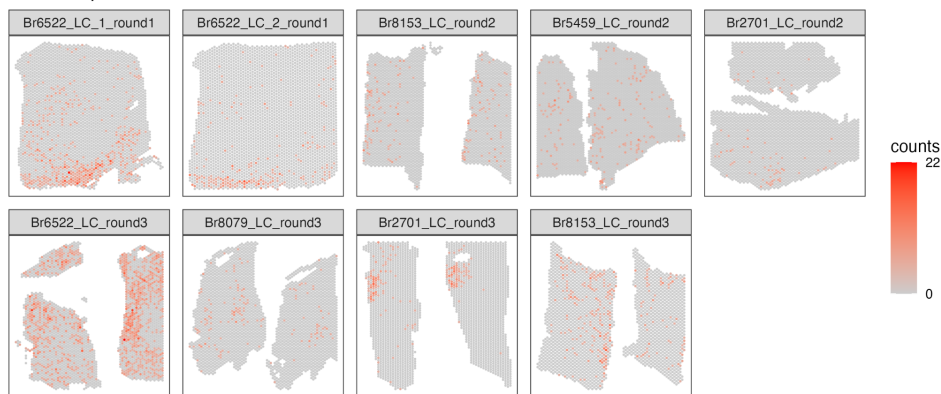

956

957

958

959

960

961

962

**Supplementary Figure 19: Spatial expression of cholinergic marker genes in Visium SRT samples.** We visualized the spatial expression of cholinergic marker genes (A) *SLC5A7* and (B) *ACHE* in the  $N=9$  initial Visium SRT samples, which showed that these genes were expressed both within and outside the annotated LC regions. Color scale shows UMI counts per spot.

963

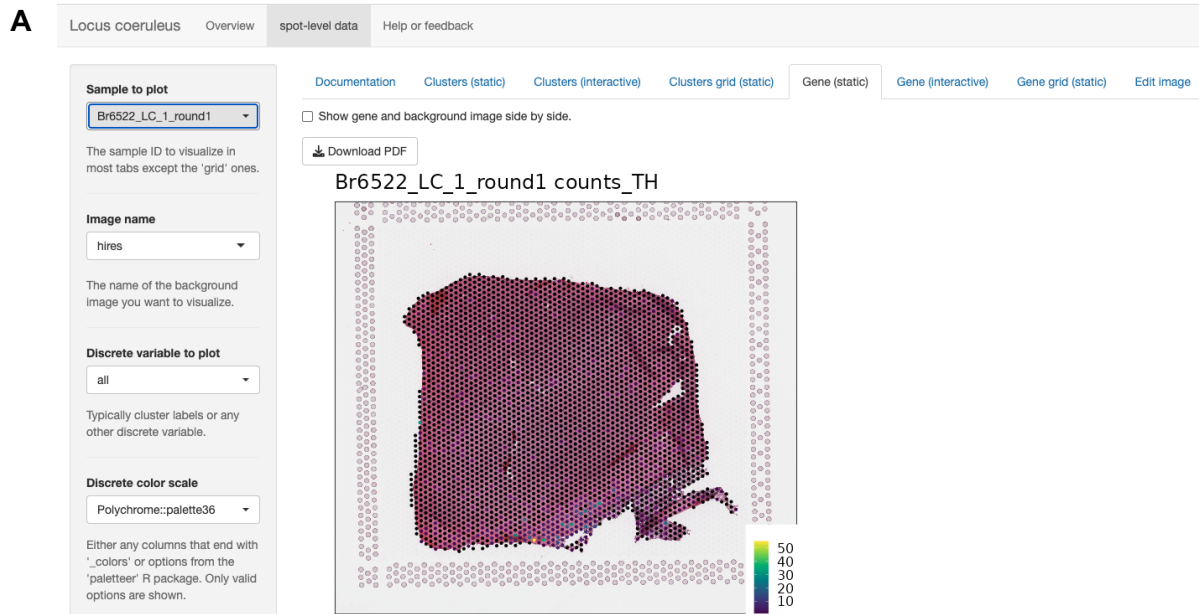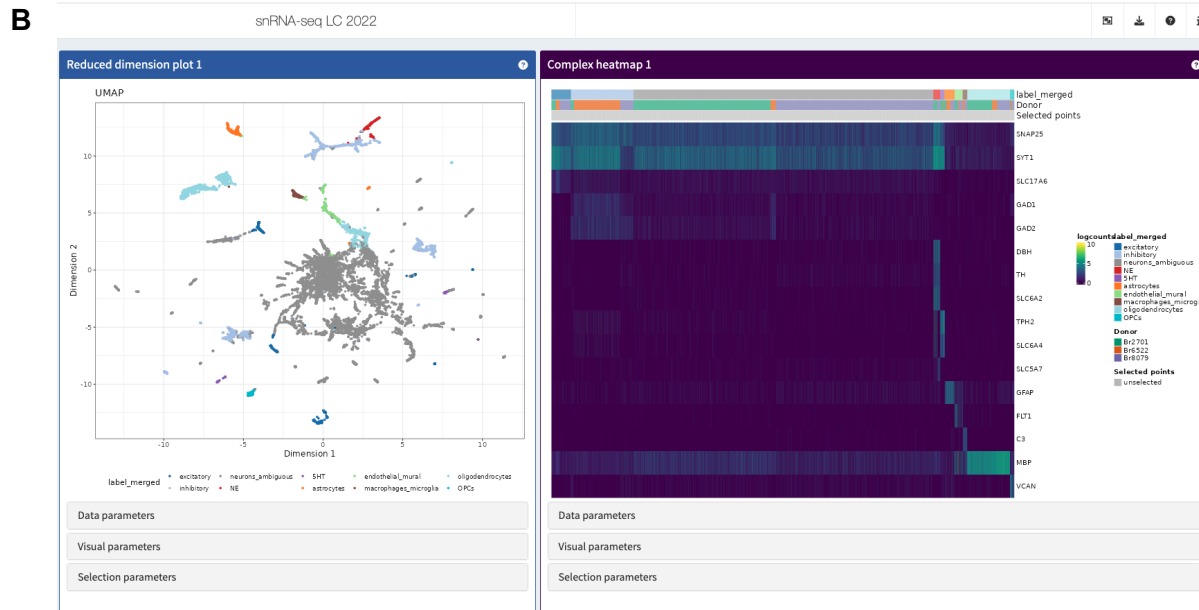

964

965

966

967

968

969

970

**Supplementary Figure 20: Interactive web-accessible data resources.** All datasets described in this manuscript are freely accessible via interactive web apps and downloadable R/Bioconductor objects (see **Table 1** for details). **(A)** Screenshot of Shiny [42] web app providing interactive access to Visium SRT data. **(B)** Screenshot of iSEE [43] web app providing interactive access to snRNA-seq data.

## 971 Back Matter

### 972 Acknowledgments

973 The authors would like to extend their gratitude to the families and next of kin of the donors for their  
974 generosity in supporting and expanding our knowledge of the human brain and neuropsychiatric  
975 disease. We would also like to thank the physicians and staff of the Office of the Chief Medical  
976 Examiner of the State of Maryland, the Western Michigan University Homer Stryker MD School of  
977 Medicine, Department of Pathology, and the Department of Pathology, University of North Dakota  
978 School of Medicine and Health Sciences Medical Examiners' office. We would also like to extend our  
979 appreciation to Drs. Lewellyn Bigelow and Fernando Goes, and Amy Deep-Soboslay for their provision  
980 of the detailed diagnostic evaluation of each case used in this study, James Tooke for his assistance  
981 with coordinating dissections within the Lieber Institute for Brain Development (LIBD) Human Brain  
982 Repository and Daniel Weinberger for suggestions and advice on the manuscript.

### 983 Author Contributions

984 Conceptualization: KRM, KM, SCH  
985 Data Curation: LMW, HRD, MNT, MT  
986 Formal Analysis: LMW, MNT  
987 Funding acquisition: LMW, KRM, KM, SCH  
988 Investigation: HRD, MNT, SHK, AS, KDM  
989 Methodology: HRD, SHK, MNT, KRM  
990 Project Administration: KRM, KM, SCH  
991 Resources: RB, JEK, TMH  
992 Software: LMW, HRD, LCT  
993 Supervision: SCP, KRM, KM, SCH  
994 Validation: HRD  
995 Visualization: LMW, HRD, MT  
996 Writing – original draft: LMW, HRD, MNT, KM, SCH  
997 Writing – review & editing: LMW, HRD, MNT, KRM, KM, SCH

### 998 Funding

999 Research reported in this publication was supported by the Lieber Institute for Brain Development,  
000 National Institutes of Health awards U01MH122849 (KM, SCH), R01DA053581 (KM, SCH),  
001 K99HG012229 (LMW), and awards CZF2019-002443 and CZF2018-183446 (SCH) from the Chan  
002 Zuckerberg Initiative DAF, an advised fund of Silicon Valley Community Foundation.

### 003 Competing Interests

004 The authors declare that they have no competing interests. Matthew N. Tran (MNT) is now a full-time  
005 employee at 23andMe and whose current work is unrelated to the contents of this manuscript. His  
006 contributions to this manuscript were made while previously employed at the Lieber Institute for Brain  
007 Development (LIBD).

## 008 Code Availability

009 Code scripts to reproduce all analyses and figures in this manuscript, including the computational  
010 analysis workflows for the snRNA-seq and SRT data, are available from GitHub at  
011 <https://github.com/lmweber/locus-c>. We used R version 4.2 and Bioconductor version 3.15 packages  
012 for analyses in R.

## 013 Data Availability

014 The datasets described in this manuscript are freely accessible in web-based formats from  
015 [https://libd.shinyapps.io/locus-c\\_Visium/](https://libd.shinyapps.io/locus-c_Visium/) (Shiny [42] app containing Visium SRT data) and  
016 [https://libd.shinyapps.io/locus-c\\_snRNA-seq/](https://libd.shinyapps.io/locus-c_snRNA-seq/) (iSEE [43] app containing snRNA-seq data), and in  
017 R/Bioconductor formats from <https://bioconductor.org/packages/WeberDivechaLCdata> (R/Bioconductor  
018 ExperimentHub data package containing Visium SRT data in SpatialExperiment [44] format and  
019 snRNA-seq data in SingleCellExperiment [33] format). The R/Bioconductor data package is available in  
020 Bioconductor release version 3.16 from Nov 2, 2022 onwards. Instructions to install and access the  
021 R/Bioconductor data package are also available from GitHub at  
022 <https://github.com/lmweber/WeberDivechaLCdata>. Raw data including FASTQ sequence data files and  
023 raw image files will be made available from a Globus endpoint.

024

025

026

## References

- 027 1. Poe GR, Foote S, Eschenko O, Johansen JP, Bouret S, Aston-Jones G, et al. Locus coeruleus: a new look  
028 at the blue spot. *Nat Rev Neurosci*. 2020;21: 644–659. doi:10.1038/s41583-020-0360-9
- 029 2. Chandler DJ, Jensen P, McCall JG, Pickering AE, Schwarz LA, Totah NK. Redefining noradrenergic  
030 neuromodulation of behavior: impacts of a modular locus coeruleus architecture. *J Neurosci*. 2019;39:  
031 8239–8249. doi:10.1523/JNEUROSCI.1164-19.2019
- 032 3. Sara SJ. The locus coeruleus and noradrenergic modulation of cognition. *Nat Rev Neurosci*. 2009;10: 211–  
033 223. doi:10.1038/nrn2573
- 034 4. Morris LS, McCall JG, Charney DS, Murrough JW. The role of the locus coeruleus in the generation of  
035 pathological anxiety. *Brain Neurosci Adv*. 2020;4: 2398212820930321. doi:10.1177/2398212820930321
- 036 5. German DC, Walker BS, Manaye K, Smith WK, Woodward DJ, North AJ. The human locus coeruleus:  
037 computer reconstruction of cellular distribution. *J Neurosci*. 1988;8: 1776–1788.
- 038 6. Braak H, Del Trecidi K. Neuroanatomy and pathology of sporadic Alzheimer's disease. *Adv Anat Embryol*  
039 *Cell Biol*. 2015;215: 1–162.
- 040 7. Mravec B, Lejavova K, Cubinkova V. Locus (coeruleus) minoris resistentiae in pathogenesis of Alzheimer's  
041 disease. *Curr Alzheimer Res*. 2014;11: 992–1001. doi:10.2174/1567205011666141107130505
- 042 8. Weinshenker D. Long road to ruin: noradrenergic dysfunction in neurodegenerative disease. *Trends*  
043 *Neurosci*. 2018;41: 211–223. doi:10.1016/j.tics.2018.01.010
- 044 9. Mather M, Harley CW. The locus coeruleus: essential for maintaining cognitive function and the aging brain.  
045 *Trends Cogn Sci (Regul Ed)*. 2016;20: 214–226. doi:10.1016/j.tics.2016.01.001
- 046 10. Chalermpananupap T, Weinshenker D, Rorabaugh JM. Down but not out: the consequences of pretangle  
047 tau in the locus coeruleus. *Neural Plast*. 2017;2017: 7829507. doi:10.1155/2017/7829507
- 048 11. Wilson RS, Nag S, Boyle PA, Hizel LP, Yu L, Buchman AS, et al. Neural reserve, neuronal density in the  
049 locus ceruleus, and cognitive decline. *Neurology*. 2013;80: 1202–1208.  
050 doi:10.1212/WNL.0b013e3182897103
- 051 12. Grudzien A, Shaw P, Weintraub S, Bigio E, Mash DC, Mesulam MM. Locus coeruleus neurofibrillary  
052 degeneration in aging, mild cognitive impairment and early Alzheimer's disease. *Neurobiol Aging*. 2007;28:  
053 327–335. doi:10.1016/j.neurobiolaging.2006.02.007
- 054 13. Andrés-Benito P, Fernández-Dueñas V, Carmona M, Escobar LA, Torrejón-Escribano B, Aso E, et al.  
055 Locus coeruleus at asymptomatic early and middle Braak stages of neurofibrillary tangle pathology.  
056 *Neuropathol Appl Neurobiol*. 2017;43: 373–392. doi:10.1111/nan.12386
- 057 14. Braak H, Del Tredici K. Where, when, and in what form does sporadic Alzheimer's disease begin? *Curr*  
058 *Opin Neurol*. 2012;25: 708–714. doi:10.1097/WCO.0b013e32835a3432
- 059 15. Del Tredici K, Braak H. Dysfunction of the locus coeruleus-norepinephrine system and related circuitry in  
060 Parkinson's disease-related dementia. *J Neurol Neurosurg Psychiatr*. 2013;84: 774–783. doi:10.1136/jnnp-  
061 2011-301817
- 062 16. Asherson P, Buitelaar J, Faraone SV, Rohde LA. Adult attention-deficit hyperactivity disorder: key  
063 conceptual issues. *Lancet Psychiatry*. 2016;3: 568–578. doi:10.1016/S2215-0366(16)30032-3
- 064 17. Biederman J, Spencer T. Attention-deficit/hyperactivity disorder (ADHD) as a noradrenergic disorder. *Biol*  
065 *Psychiatry*. 1999;46: 1234–1242. doi:10.1016/s0006-3223(99)00192-4
- 066 18. Bouret S, Sara SJ. Reward expectation, orientation of attention and locus coeruleus-medial frontal cortex  
067 interplay during learning. *Eur J Neurosci*. 2004;20: 791–802. doi:10.1111/j.1460-9568.2004.03526.x
- 068 19. Bymaster FP, Katner JS, Nelson DL, Hemrick-Luecke SK, Threlkeld PG, Heiligenstein JH, et al.



- 069 Atomoxetine increases extracellular levels of norepinephrine and dopamine in prefrontal cortex of rat: a  
070 potential mechanism for efficacy in attention deficit/hyperactivity disorder. *Neuropsychopharmacology*.  
071 2002;27: 699–711. doi:10.1016/S0893-133X(02)00346-9
- 072 20. Newman LA, Darling J, McGaughy J. Atomoxetine reverses attentional deficits produced by noradrenergic  
073 deafferentation of medial prefrontal cortex. *Psychopharmacology (Berl)*. 2008;200: 39–50.  
074 doi:10.1007/s00213-008-1097-8
- 075 21. Kamath T, Abdulraouf A, Burris SJ, Langlieb J, Gazestani V, Nadaf NM, et al. Single-cell genomic profiling  
076 of human dopamine neurons identifies a population that selectively degenerates in Parkinson's disease. *Nat*  
077 *Neurosci*. 2022;25: 588–595. doi:10.1038/s41593-022-01061-1
- 078 22. Maynard KR, Collado-Torres L, Weber LM, Uyttingco C, Barry BK, Williams SR, et al. Transcriptome-scale  
079 spatial gene expression in the human dorsolateral prefrontal cortex. *Nat Neurosci*. 2021;24: 425–436.  
080 doi:10.1038/s41593-020-00787-0
- 081 23. Tran MN, Maynard KR, Spangler A, Huuki LA, Montgomery KD, Sadashivaiah V, et al. Single-nucleus  
082 transcriptome analysis reveals cell-type-specific molecular signatures across reward circuitry in the human  
083 brain. *Neuron*. 2021;109: 3088-3103.e5. doi:10.1016/j.neuron.2021.09.001
- 084 24. Okaty BW, Commons KG, Dymecki SM. Embracing diversity in the 5-HT neuronal system. *Nat Rev*  
085 *Neurosci*. 2019;20: 397–424. doi:10.1038/s41583-019-0151-3
- 086 25. Mulvey B, Bhatti DL, Gyawali S, Lake AM, Kriaucionis S, Ford CP, et al. Molecular and functional sex  
087 differences of noradrenergic neurons in the mouse locus coeruleus. *Cell Rep*. 2018;23: 2225–2235.  
088 doi:10.1016/j.celrep.2018.04.054
- 089 26. Grimm J, Mueller A, Hefti F, Rosenthal A. Molecular basis for catecholaminergic neuron diversity. *Proc Natl*  
090 *Acad Sci USA*. 2004;101: 13891–13896. doi:10.1073/pnas.0405340101
- 091 27. Luskin AT, Li L, Fu X, Barcomb K, Blackburn T, Li EM, et al. A diverse network of pericoerulear neurons  
092 control arousal states. *bioRxiv*. 2022.
- 093 28. 10x Genomics. Visium Spatial Gene Expression. 2022 [cited 28 Jul 2022]. Available:  
094 <https://www.10xgenomics.com/products/spatial-gene-expression>
- 095 29. 10x Genomics. Chromium Single Cell Gene Expression. 2022 [cited 30 Jul 2022]. Available:  
096 <https://www.10xgenomics.com/products/single-cell-gene-expression>
- 097 30. Counts SE, Mufson EJ. Locus Coeruleus. *The human nervous system*. Elsevier; 2012. pp. 425–438.  
098 doi:10.1016/B978-0-12-374236-0.10012-4
- 099 31. Maynard KR, Tippani M, Takahashi Y, Phan BN, Hyde TM, Jaffe AE, et al. dotdotdot: an automated  
100 approach to quantify multiplex single molecule fluorescent in situ hybridization (smFISH) images in complex  
101 tissues. *Nucleic Acids Res*. 2020. doi:10.1093/nar/gkaa312
- 102 32. Wang F, Flanagan J, Su N, Wang L-C, Bui S, Nielson A, et al. RNAscope: a novel in situ RNA analysis  
103 platform for formalin-fixed, paraffin-embedded tissues. *J Mol Diagn*. 2012;14: 22–29.  
104 doi:10.1016/j.jmoldx.2011.08.002
- 105 33. Amezquita RA, Lun ATL, Becht E, Carey VJ, Carpp LN, Geistlinger L, et al. Orchestrating single-cell  
106 analysis with Bioconductor. *Nat Methods*. 2020;17: 137–145. doi:10.1038/s41592-019-0654-x
- 107 34. Lun ATL, McCarthy DJ, Marioni JC. A step-by-step workflow for low-level analysis of single-cell RNA-seq  
108 data with Bioconductor. [version 2; peer review: 3 approved, 2 approved with reservations]. *F1000Res*.  
109 2016;5: 2122. doi:10.12688/f1000research.9501.2
- 110 35. Zhao E, Stone MR, Ren X, Guenthoer J, Smythe KS, Pulliam T, et al. Spatial transcriptomics at subspot  
111 resolution with BayesSpace. *Nat Biotechnol*. 2021;39: 1375–1384. doi:10.1038/s41587-021-00935-2
- 112 36. Korsunsky I, Millard N, Fan J, Slowikowski K, Zhang F, Wei K, et al. Fast, sensitive and accurate integration  
113 of single-cell data with Harmony. *Nat Methods*. 2019;16: 1289–1296. doi:10.1038/s41592-019-0619-0

- 114 37. Gao LL, Bien J, Witten D. Selective inference for hierarchical clustering. *J Am Stat Assoc.* 2022; 1–27.  
115 doi:10.1080/01621459.2022.2116331
- 116 38. Weber LM. nnSVG: scalable identification of spatially variable genes using nearest-neighbor Gaussian  
117 processes. *bioRxiv.* 2022.
- 118 39. Germain P-L, Lun A, Garcia Meixide C, Macnair W, Robinson MD. Doublet identification in single-cell  
119 sequencing data using scDbIFinder. *F1000Res.* 2021;10: 979. doi:10.12688/f1000research.73600.2
- 120 40. Ren J, Isakova A, Friedmann D, Zeng J, Grutzner SM, Pun A, et al. Single-cell transcriptomes and whole-  
121 brain projections of serotonin neurons in the mouse dorsal and median raphe nuclei. *eLife.* 2019;8.  
122 doi:10.7554/eLife.49424
- 123 41. Kleshchevnikov V, Shmatko A, Dann E, Aivazidis A, King HW, Li T, et al. Cell2location maps fine-grained  
124 cell types in spatial transcriptomics. *Nat Biotechnol.* 2022;40: 661–671. doi:10.1038/s41587-021-01139-4
- 125 42. Chang W, Cheng J, Allaire JJ, Xie Y, McPherson J. shiny: Web Application Framework for R. 2019.
- 126 43. Rue-Albrecht K, Marini F, Soneson C, Lun ATL. iSEE: Interactive SummarizedExperiment Explorer.  
127 [version 1; peer review: 3 approved]. *F1000Res.* 2018;7: 741. doi:10.12688/f1000research.14966.1
- 128 44. Righelli D, Weber LM, Crowell HL, Pardo B, Collado-Torres L, Ghazanfar S, et al. SpatialExperiment:  
129 infrastructure for spatially resolved transcriptomics data in R using Bioconductor. *Bioinformatics.* 2022.  
130 doi:10.1093/bioinformatics/btac299
- 131 45. Fan Y, Chen P, Raza MU, Szebeni A, Szebeni K, Ordway GA, et al. Altered expression of phox2  
132 transcription factors in the locus coeruleus in major depressive disorder mimicked by chronic stress and  
133 corticosterone treatment in vivo and in vitro. *Neuroscience.* 2018;393: 123–137.  
134 doi:10.1016/j.neuroscience.2018.09.038
- 135 46. Ádori C, Glück L, Barde S, Yoshitake T, Kovacs GG, Mulder J, et al. Critical role of somatostatin receptor 2  
136 in the vulnerability of the central noradrenergic system: new aspects on Alzheimer's disease. *Acta*  
137 *Neuropathol.* 2015;129: 541–563. doi:10.1007/s00401-015-1394-3
- 138 47. Pietrowski MJ, Gabr AA, Kozlov S, Blum D, Halle A, Carvalho K. Glial purinergic signaling in  
139 neurodegeneration. *Front Neurol.* 2021;12: 654850. doi:10.3389/fneur.2021.654850
- 140 48. Moore D, Iritani S, Chambers J, Emson P. Immunohistochemical localization of the P2Y1 purinergic  
141 receptor in Alzheimer's disease. *Neuroreport.* 2000;11: 3799–3803. doi:10.1097/00001756-200011270-  
142 00041
- 143 49. Cueto-Ureña C, Mocholí E, Escrivá-Fernández J, González-Granero S, Sánchez-Hernández S, Solana-Orts  
144 A, et al. Rnd3 expression is necessary to maintain mitochondrial homeostasis but dispensable for  
145 autophagy. *Front Cell Dev Biol.* 2022;10: 834561. doi:10.3389/fcell.2022.834561
- 146 50. Dong H, Sun Q, Zhang Y, Li Y, Yuan F, Mao S, et al. Genetic deletion of Rnd3 suppresses apoptosis  
147 through NF- $\kappa$ B signaling in the brain. *Oncol Rep.* 2021;45: 595–605. doi:10.3892/or.2020.7884
- 148 51. van Hulzen KJE, Scholz CJ, Franke B, Ripke S, Klein M, McQuillin A, et al. Genetic Overlap Between  
149 Attention-Deficit/Hyperactivity Disorder and Bipolar Disorder: Evidence From Genome-wide Association  
150 Study Meta-analysis. *Biol Psychiatry.* 2017;82: 634–641. doi:10.1016/j.biopsych.2016.08.040
- 151 52. Nakashima A, Yamaguchi H, Kodani Y, Kaneko YS, Kawata M, Nagasaki H, et al. Identification by nano-  
152 LC-MS/MS of NT5DC2 as a protein binding to tyrosine hydroxylase: Down-regulation of NT5DC2 by siRNA  
153 increases catecholamine synthesis in PC12D cells. *Biochem Biophys Res Commun.* 2019;516: 1060–1065.  
154 doi:10.1016/j.bbrc.2019.06.156
- 155 53. Caglayan E, Liu Y, Konopka G. Neuronal ambient RNA contamination causes misinterpreted and masked  
156 cell types in brain single-nuclei datasets. *Neuron.* 2022. doi:10.1016/j.neuron.2022.09.010
- 157 54. Iijima K. Chemocytology of the rat locus coeruleus. *Histol Histopathol.* 1993;8: 581–591.
- 158 55. Iijima K. An immunocytochemical study on the GABA-ergic and serotonin-ergic neurons in rat locus

- 159 ceruleus with special reference to possible existence of the masked indoleamine cells. *Acta Histochem.*  
160 1989;87: 43–57. doi:10.1016/S0065-1281(89)80029-7
- 161 56. de Leeuw CA, Mooij JM, Heskes T, Posthuma D. MAGMA: generalized gene-set analysis of GWAS data.  
162 *PLoS Comput Biol.* 2015;11: e1004219. doi:10.1371/journal.pcbi.1004219
- 163 57. Lipska BK, Deep-Soboslay A, Weickert CS, Hyde TM, Martin CE, Herman MM, et al. Critical factors in gene  
164 expression in postmortem human brain: Focus on studies in schizophrenia. *Biol Psychiatry.* 2006;60: 650–  
165 658. doi:10.1016/j.biopsych.2006.06.019
- 166 58. Zandi PP, Jaffe AE, Goes FS, Burke EE, Collado-Torres L, Huuki-Myers L, et al. Amygdala and anterior  
167 cingulate transcriptomes from individuals with bipolar disorder reveal downregulated neuroimmune and  
168 synaptic pathways. *Nat Neurosci.* 2022;25: 381–389. doi:10.1038/s41593-022-01024-6
- 169 59. 10x Genomics. Space Ranger. 9 Oct 2022 [cited 9 Oct 2022]. Available:  
170 <https://support.10xgenomics.com/spatial-gene-expression/software/pipelines/latest/what-is-space-ranger>
- 171 60. McCarthy DJ, Campbell KR, Lun ATL, Wills QF. Scater: pre-processing, quality control, normalization and  
172 visualization of single-cell RNA-seq data in R. *Bioinformatics.* 2017;33: 1179–1186.  
173 doi:10.1093/bioinformatics/btw777
- 174 61. Ritchie ME, Phipson B, Wu D, Hu Y, Law CW, Shi W, et al. limma powers differential expression analyses  
175 for RNA-sequencing and microarray studies. *Nucleic Acids Res.* 2015;43: e47. doi:10.1093/nar/gkv007
- 176 62. 10x Genomics. Cell Ranger. 2022 [cited 19 Oct 2022]. Available: [https://support.10xgenomics.com/single-](https://support.10xgenomics.com/single-cell-gene-expression/software/pipelines/latest/what-is-cell-ranger)  
177 [cell-gene-expression/software/pipelines/latest/what-is-cell-ranger](https://support.10xgenomics.com/single-cell-gene-expression/software/pipelines/latest/what-is-cell-ranger)
